# Supplementary material
Source: Royal Society of Chemistry journal article supplement (doi:10.1039/d6cp00722h)
Supplement: d6cp00722h1.pdf [file d6cp00722h1.pdf]

# **Bending-induced modulation doping: a promising tendency in silicon nanowires**

*Yuehan Li<sup>a\*</sup>, Yue Zhang<sup>a\*</sup>, Suyang Zhang<sup>a</sup>, Zun Xie<sup>†a</sup> and Zhao Liu<sup>‡a</sup>*

<sup>a</sup>Department of Physics and Hebei Advanced Thin Film Laboratory, Hebei Normal University, Shijiazhuang, 050024, China

<sup>†</sup>Corresponding author: [zxie@hebtu.edu.cn](mailto:zxie@hebtu.edu.cn)

<sup>‡</sup>Corresponding author: [zliu@hebtu.edu.cn](mailto:zliu@hebtu.edu.cn)

\* These authors contributed equally.

S1. Doping preference for [001]-oriented tetrahedral SiNW.

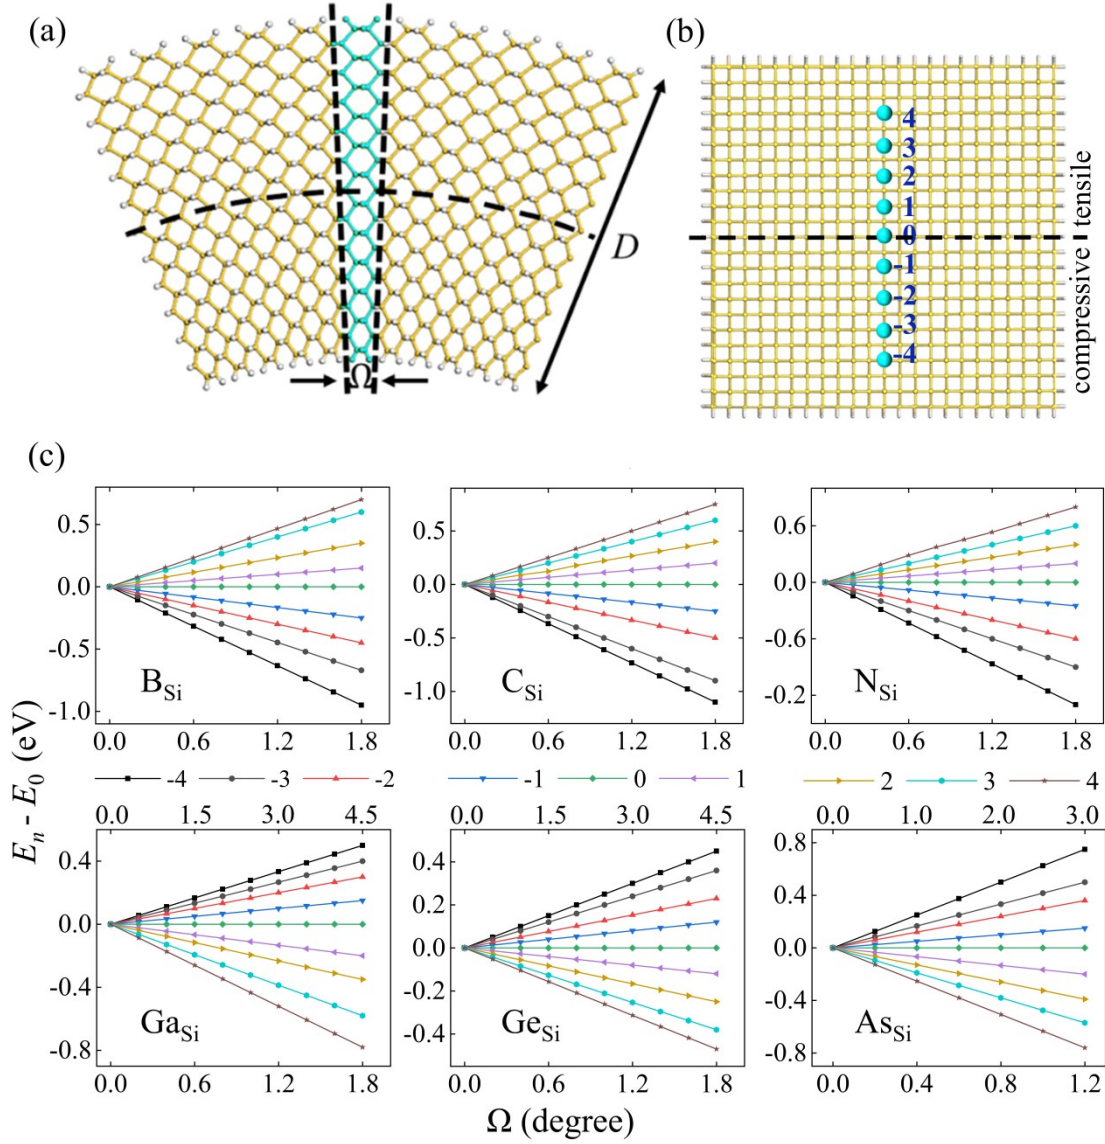

**FIG. S1** (a) A side view of a bent tetrahedral SiNW along the [111] growth direction, with a diameter  $D = 4.22$  nm.  $\Omega$  represents the bending angle, and the dashed arc indicates the strain-free neutral surface. The primitive motif used in calculation is shown in green. (b) A cross-section of the SiNW depicted in (a), with 9 doping sites (red balls): sites  $n = 1, 2, 3, 4$  are on the tensile side, sites  $n = -1, -2, -3, -4$  are on the compressive side, site  $n = 0$  is on the neutral surface. (c) The relative formation energy  $E_n - E_0$  at site  $n$  versus

the bending angle  $\Omega$ .  $X_{\text{Si}}$  ( $X = \text{B}, \text{C}, \text{N}, \text{Ga}, \text{Ge}, \text{As}$ ) denotes the doping cases where the host Si atom is substituted with the dopant  $X$  atom.

S2. Energy bands and carrier distributions for [001]-oriented SiNW

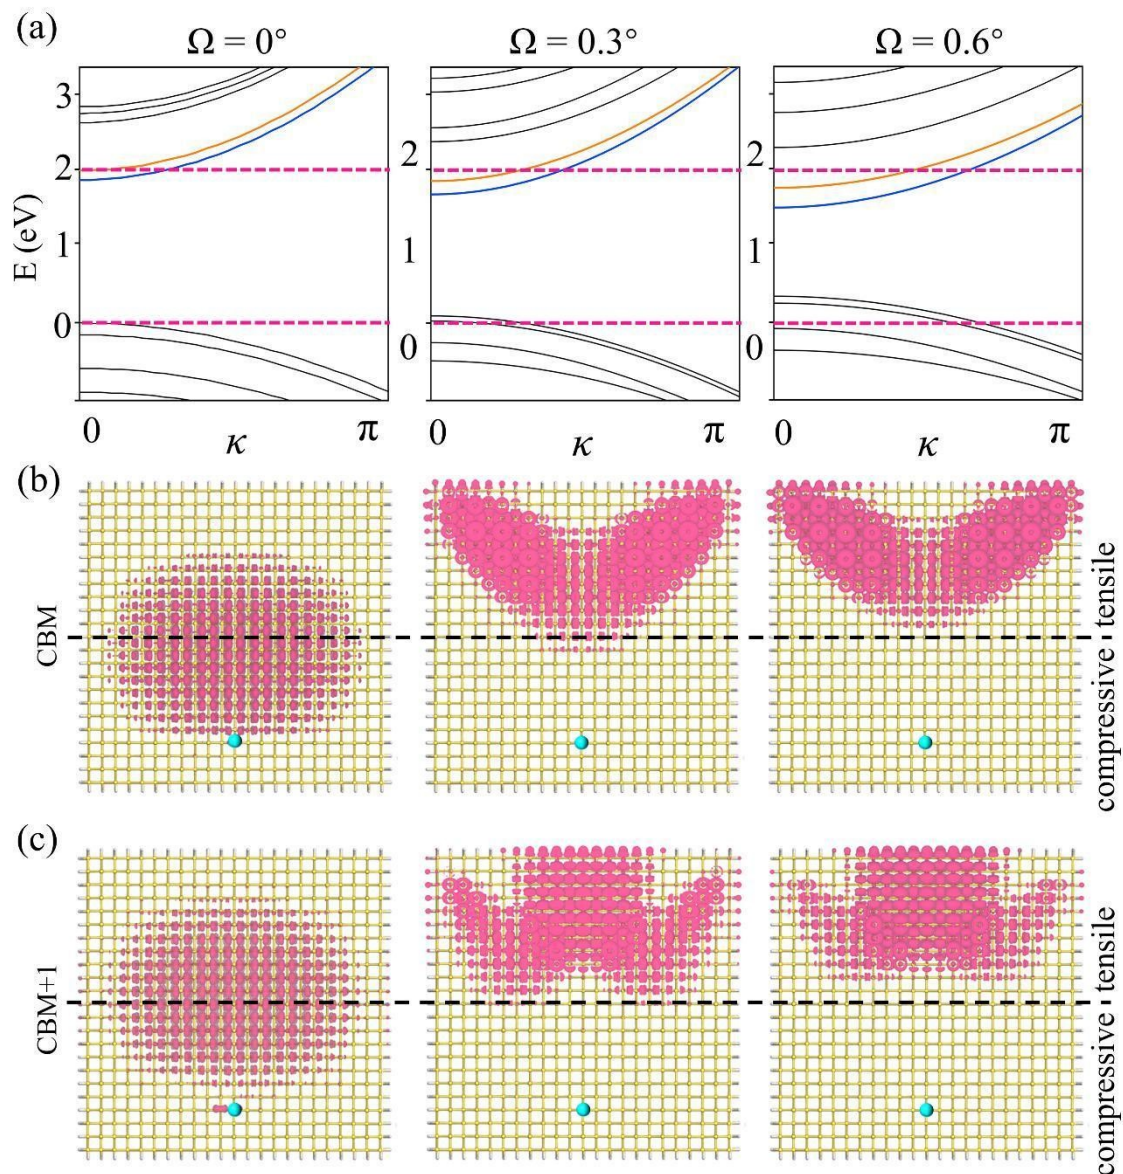

**FIG. S2** [001]-oriented SiNW with a diameter of  $D = 4.22$  nm after N doped at position  $n = -4$ . (a) Electronic energy bands for strain-free NW and bending angles with  $\Omega = 0.3^\circ$  and  $\Omega = 0.6^\circ$ . Electronic density distribution (pink spheres) for the (b) CBM state and (c) the CBM+1 state, where the CBM state corresponds to the blue line in Fig. S2(a) and the CBM+1 state corresponds to the orange line in Fig. S2(a). Dopants are represented by blue spheres. The isosurface level is  $1.72 \times 10^{-6} \text{ e } \text{\AA}^{-3}$ .

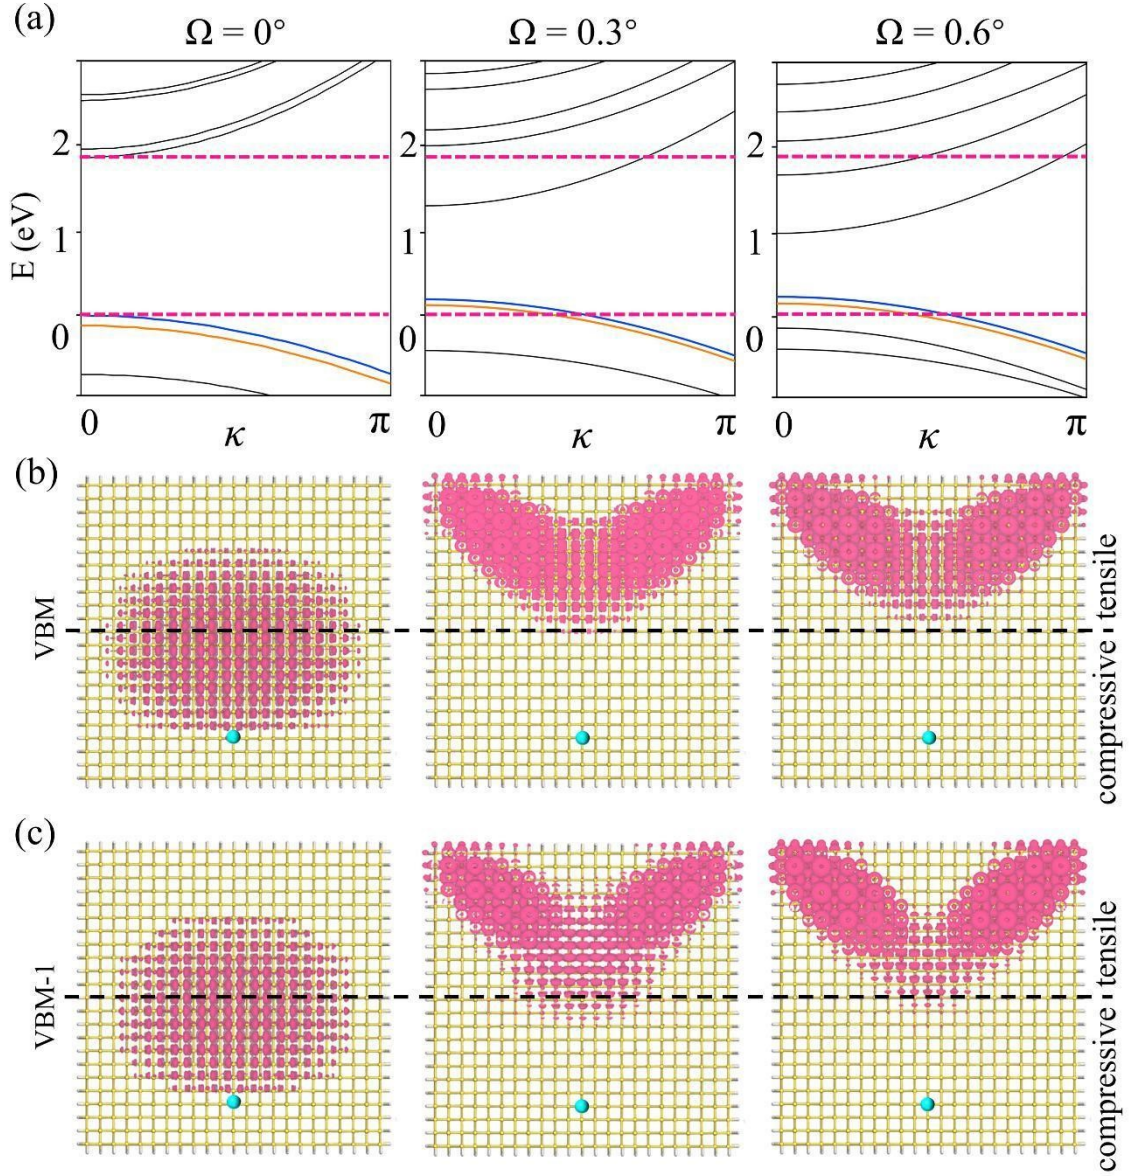

**FIG. S3** [001]-oriented SiNW with a diameter of  $D = 4.22$  nm after B doped at position  $n = -4$ . (a) Electronic energy bands for strain-free NW and bending angles with  $\Omega = 0.3^\circ$  and  $\Omega = 0.6^\circ$ . Electronic density distribution (pink spheres) for the (b) VBM state and (c) the VBM-1 state, where the VBM state corresponds to the blue line in Fig. S3(a) and the VBM-1 state corresponds to the orange line in Fig. S3(a). Dopants are represented by blue spheres. The isosurface level is  $1.72 \times 10^{-6} \text{ e \AA}^{-3}$ .

S3. Band structure for bulk Si.

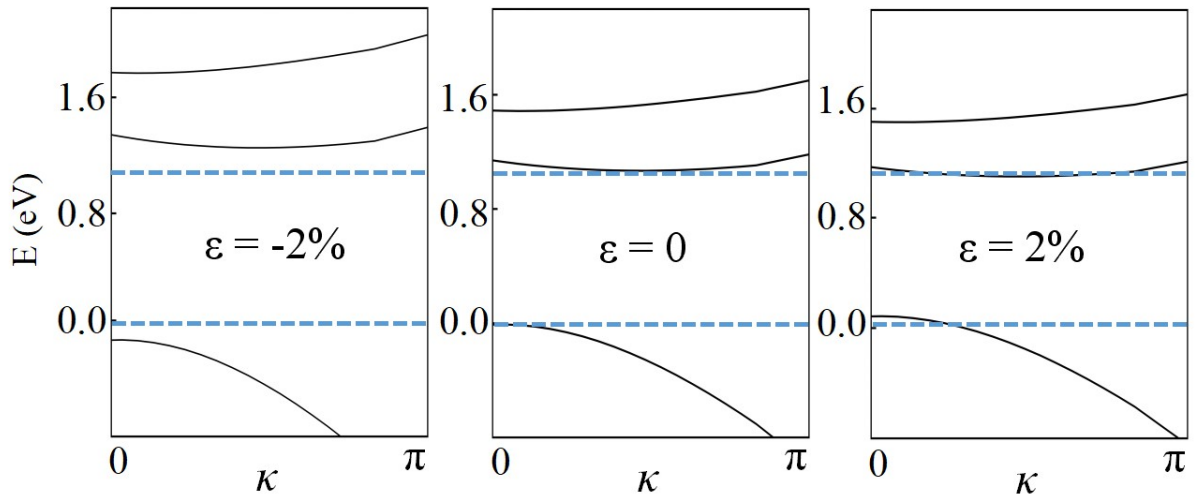

**FIG. S4** Energy band of bulk Si with uniaxial tension and compression along the [001] direction of the SiNW.

S4. The comparison between DFTB+ and DFT data.

| System  | Method | Band gap (eV)        |
|---------|--------|----------------------|
|         | DFTB+  | 1.31                 |
|         | GGA    | 0.607 <sup>(1)</sup> |
| bulk Si | BLYP   | 1.39 <sup>(2)</sup>  |
|         | BPBE   | 1.13 <sup>(2)</sup>  |
|         | Exp.   | ~1.17 <sup>(3)</sup> |

**Table S1** The calculated band gaps with different methods of bulk silicon.

| System      | Diameter (nm) | Band gap (eV) | Ref. Band gap (eV)  |
|-------------|---------------|---------------|---------------------|
|             | 0.92          | 2.85          | 2.25 <sup>(4)</sup> |
| [111] Si NW | 1.69          | 2.21          | 1.34 <sup>(4)</sup> |
|             | 2.46          | 2.04          | 1.13 <sup>(4)</sup> |
|             | 1.2           | 2.14          | 1.51 <sup>(4)</sup> |
| [011] Si NW | 2.2           | 1.77          | 0.89 <sup>(4)</sup> |
|             | 3.3           | 1.55          | 0.78 <sup>(4)</sup> |
| [001] Si NW | 1.1           | 3.23          | 2.35 <sup>(5)</sup> |
|             | 2.0           | 2.58          | 1.32 <sup>(5)</sup> |

**Table S2** The calculated band gaps comparison of SiNWs along different orient.

<sup>(1)</sup>Crystals **14**, 585 (2024).

<sup>(2)</sup>Phys. Rev. B **76**, 155435 (2007).

<sup>(3)</sup> Solid State Phys. **1**, 2 (1976).

<sup>(4)</sup>Phys. Rev. B **74**, 045116 (2006).

<sup>(5)</sup>Phys. Rev. Lett. **92**, 236805 (2004).

S5. Calculations with supercell.

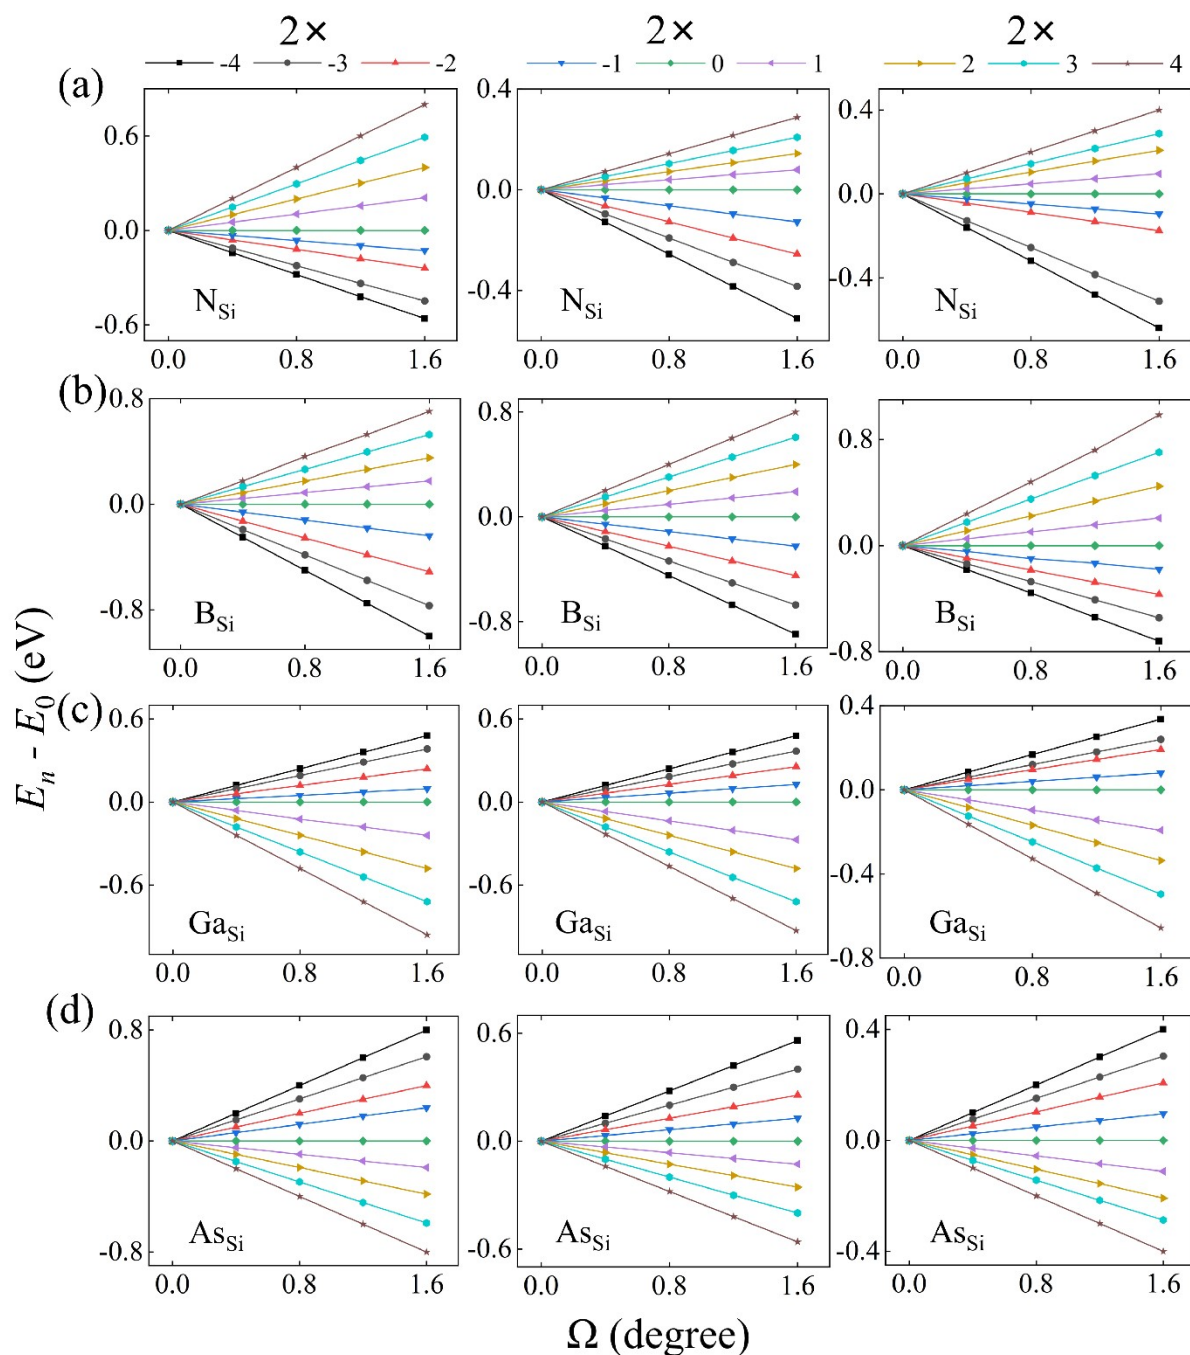

**FIG. S5** The relative formation energy versus bending angle for [111]-oriented SiNWs with  $D = 4.43$  nm in expanded supercells with doping at sites  $n = -4, -3, -2, -1, 0, 1, 2, 3, 4$ . The first, second, and third columns correspond to  $2\times$ ,  $3\times$ , and  $4\times$  supercells, respectively, with (a) N doping, (b) B doping, (c) Ga doping, and (d) As doping.

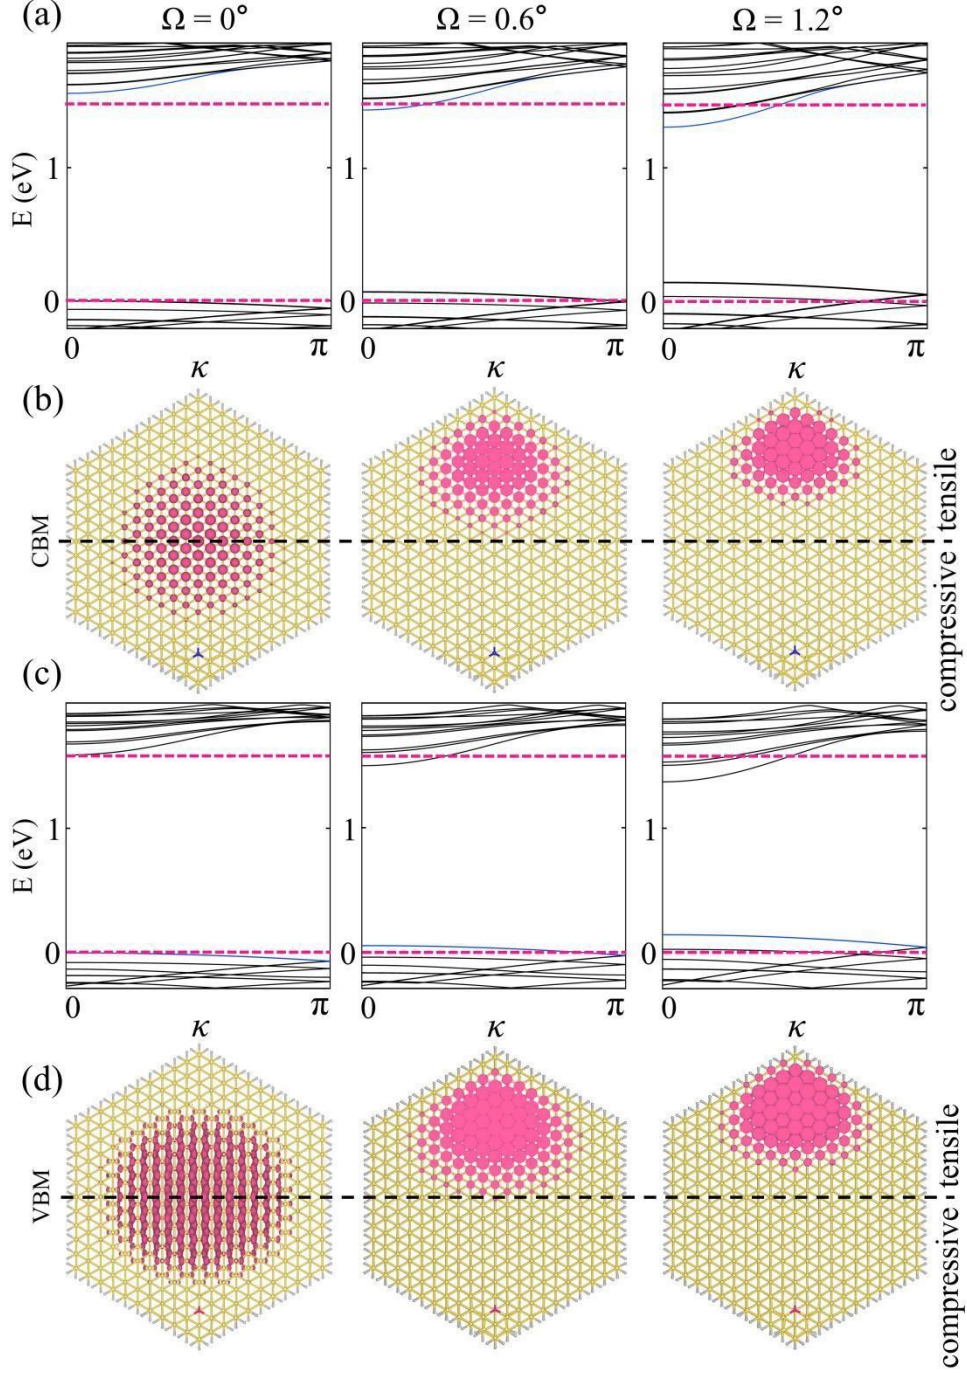

**FIG. S6** [111]-oriented SiNW with a  $2\times$  expanded supercell and a diameter of  $D = 4.43$  nm after (a) (b) N and (c) (d) B doped at position  $n = -4$ . (a) (c) Electronic energy bands for strain-free NW and bending angles with  $\Omega = 0.6^\circ$  and  $\Omega = 1.2^\circ$ . Electronic density distribution (pink spheres) for the (b) CBM state and (d) the VBM state. The isosurface level is  $1.72 \times 10^{-6} e \text{ \AA}^{-3}$ .

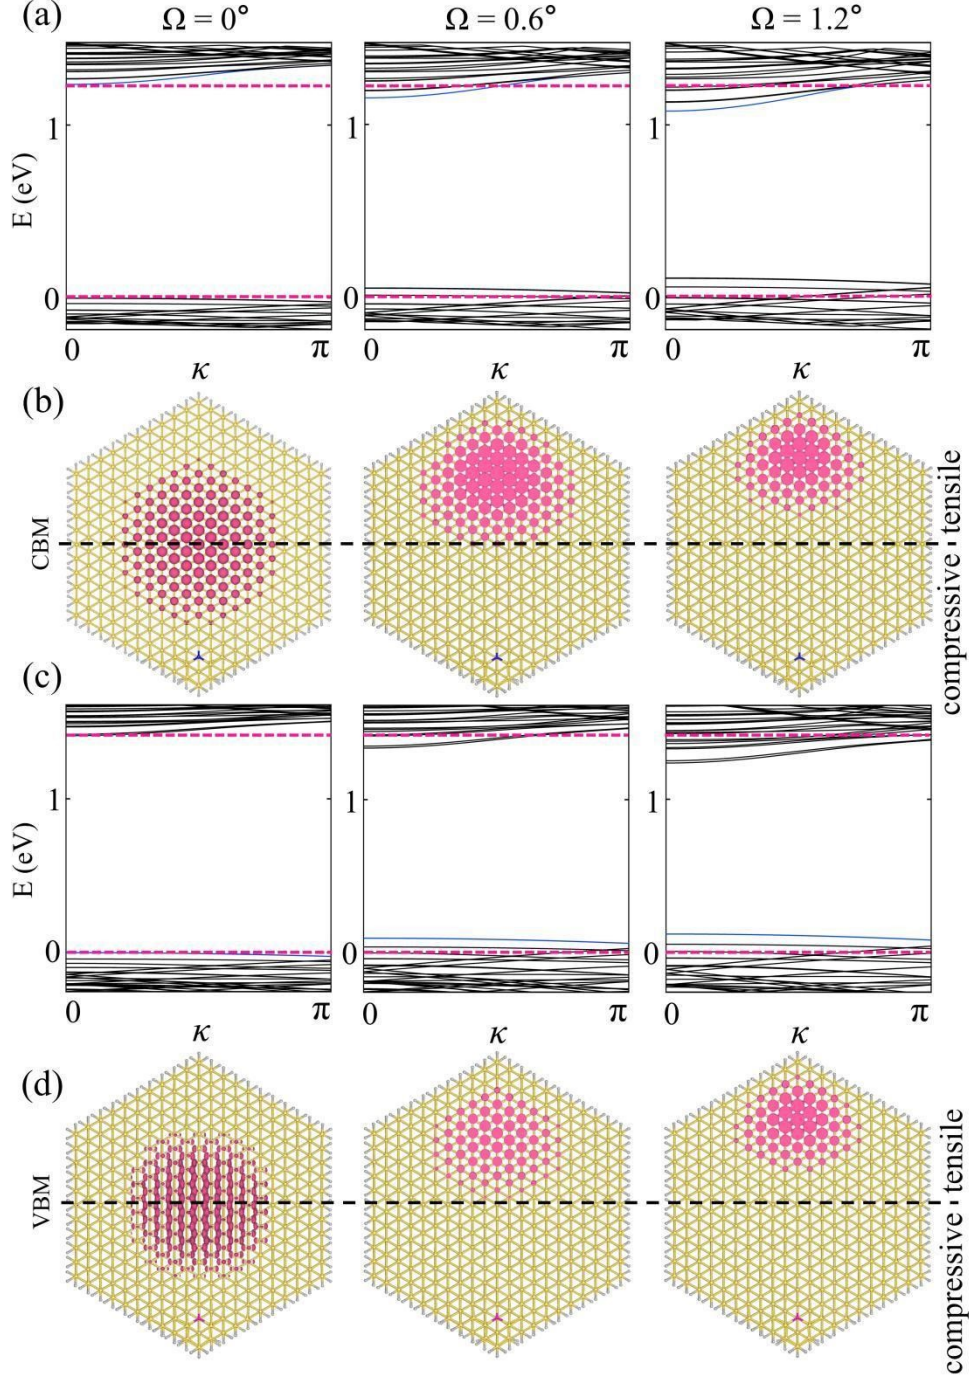

**FIG. S7** [111]-oriented SiNW with a  $3\times$  expanded supercell and a diameter of  $D = 4.43$  nm after (a) (b) N and (c) (d) B doped at position  $n = -4$ . (a) (c) Electronic energy bands for strain-free NW and bending angles with  $\Omega = 0.6^\circ$  and  $\Omega = 1.2^\circ$ . Electronic density distribution (pink spheres) for the (b) CBM state and (d) the VBM state. The isosurface level is  $1.72 \times 10^{-6} e \text{ \AA}^{-3}$ .

3.

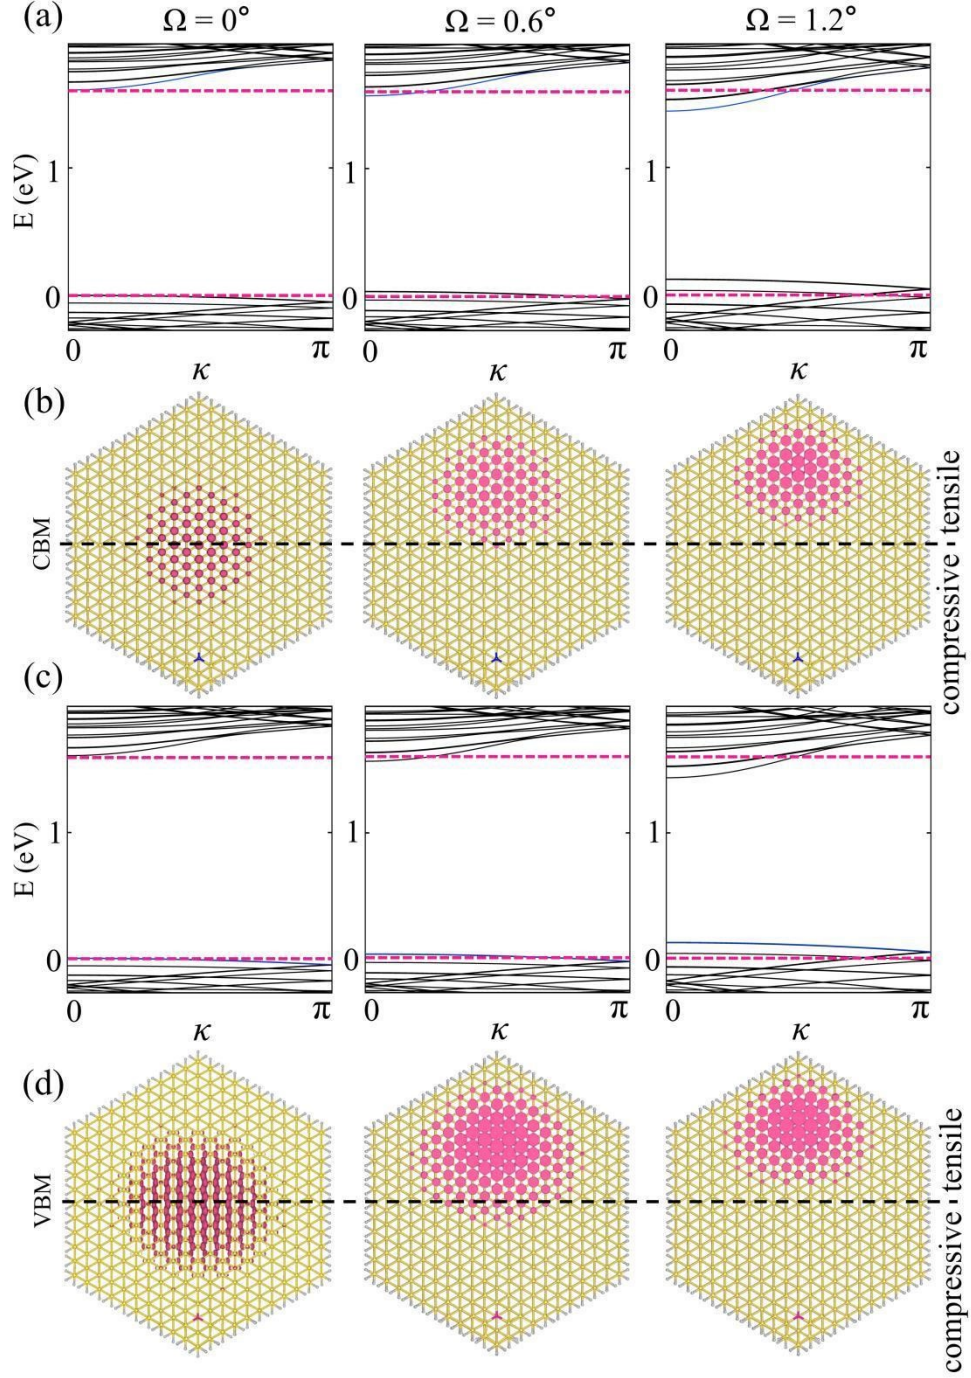

**FIG. S8** [111]-oriented SiNW with a  $4\times$  expanded supercell and a diameter of  $D = 4.43$  nm after (a) (b) N and (c) (d) B doped at position  $n = -4$ . (a) (c) Electronic energy bands for strain-free NW and bending angles with  $\Omega = 0.6^\circ$  and  $\Omega = 1.2^\circ$ . Electronic density distribution (pink spheres) for the (b) CBM state and (d) the VBM state. The isosurface level is  $1.72 \times 10^{-6} e \text{ \AA}^{-3}$ .

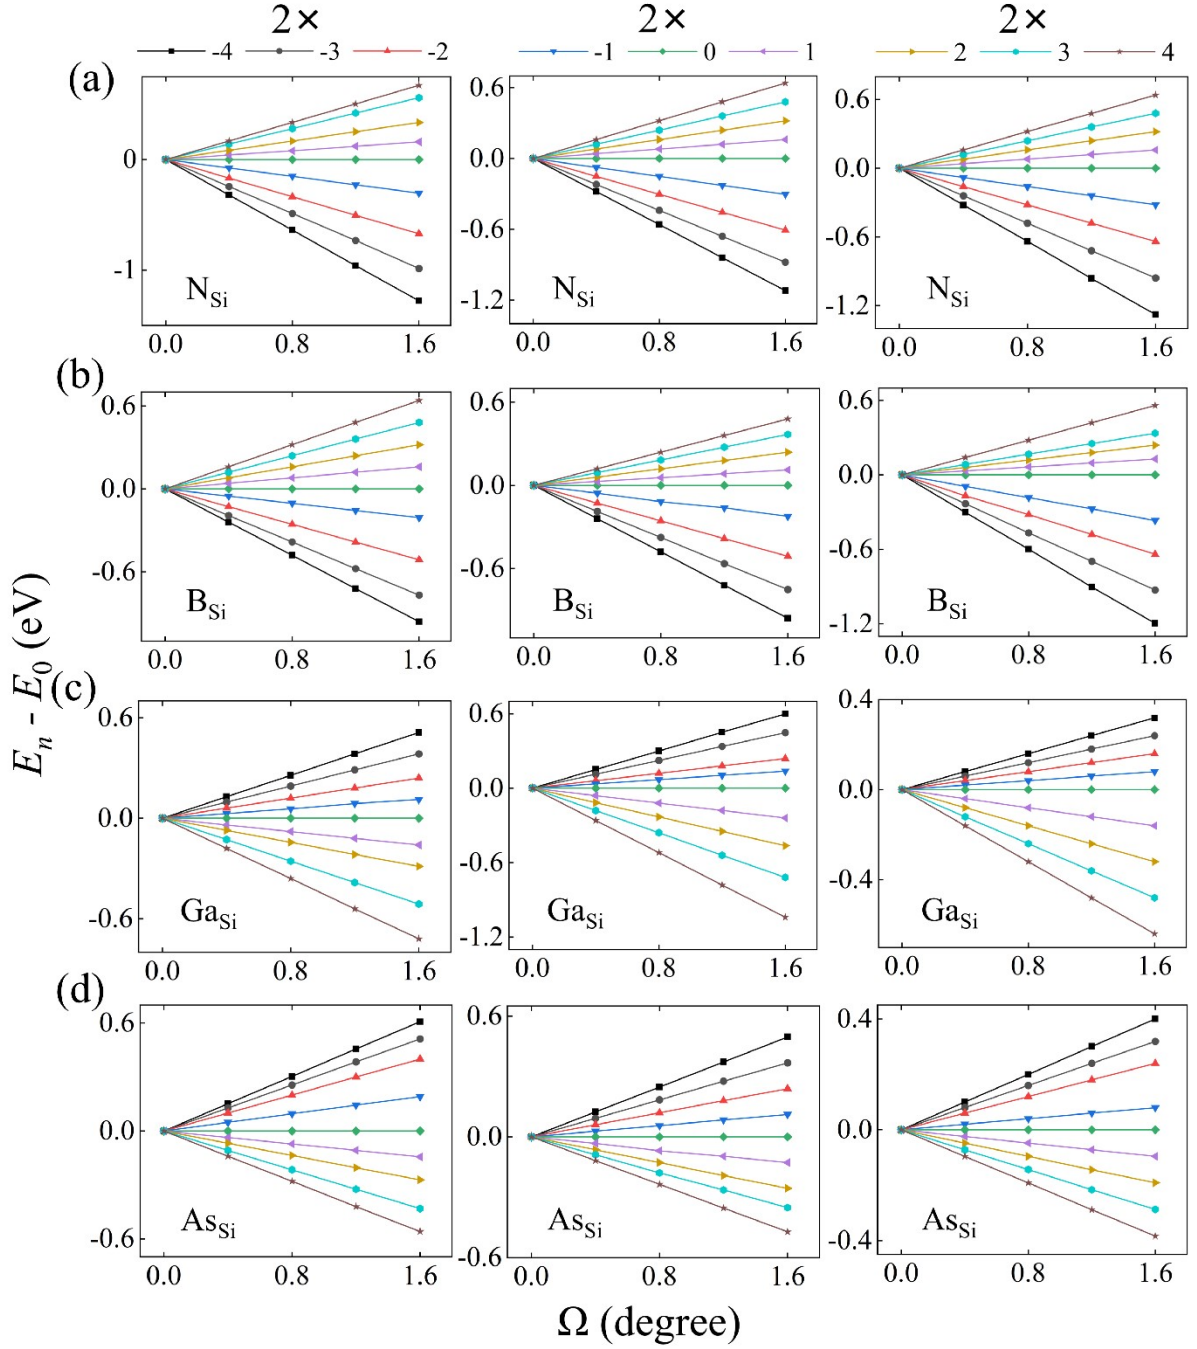

**FIG. S9** The relative formation energy versus bending angle for [001]-oriented SiNWs with  $D = 4.22$  nm in expanded supercells with doping at sites sites  $n = -4, -3, -2, -1, 0, 1, 2, 3, 4$ . The first, second, and third columns correspond to  $2\times$ ,  $3\times$ , and  $4\times$  supercells, respectively, with (a) N doping, (b) B doping, (c) Ga doping, and (d) As doping.

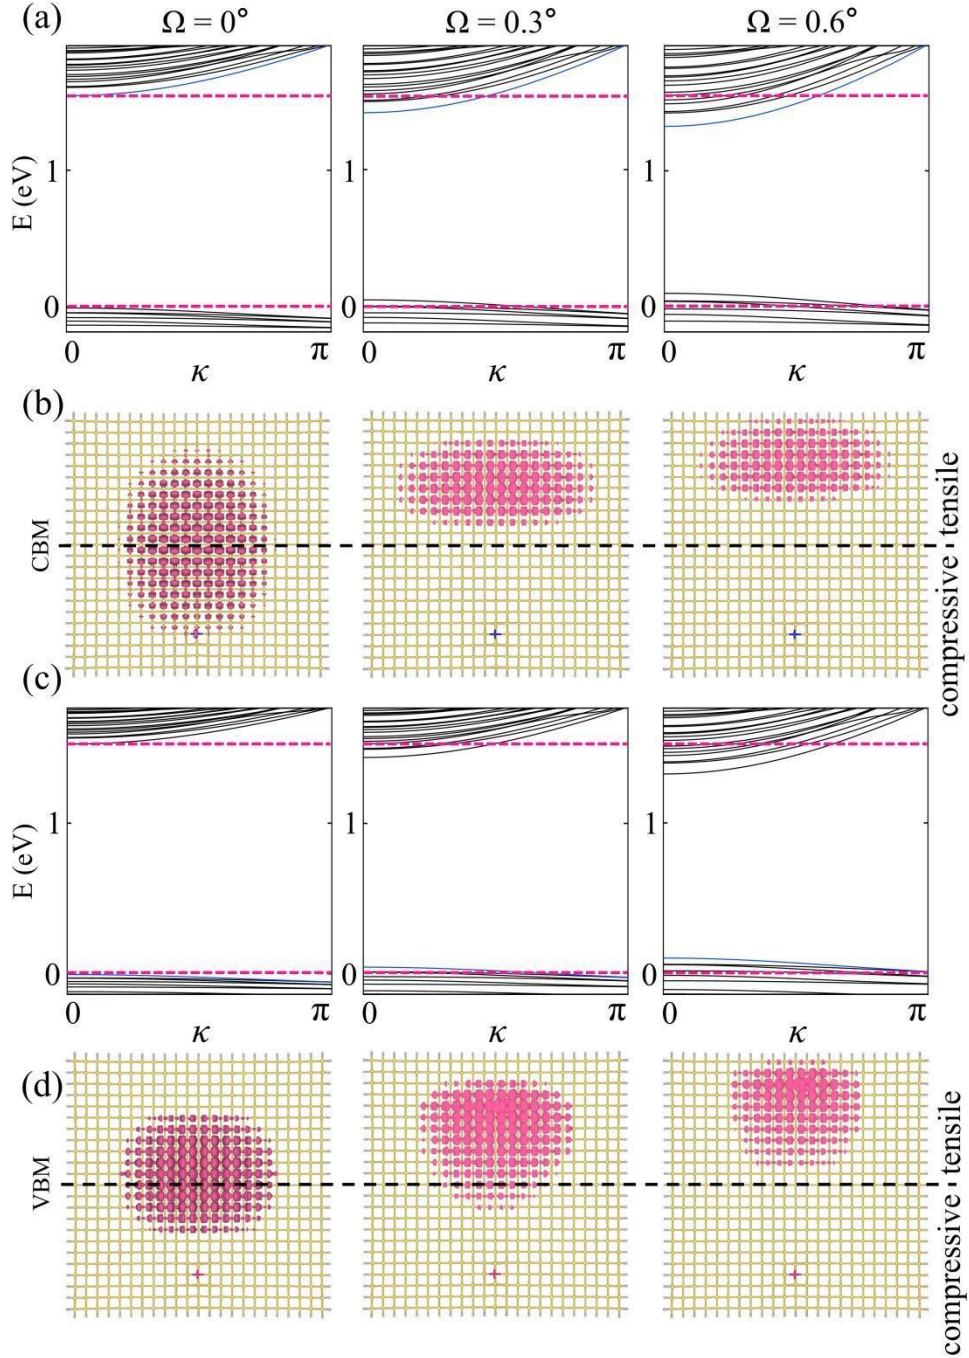

**FIG. S10** [001]-oriented SiNW with a  $2\times$  expanded supercell and a diameter of  $D = 4.22$  nm after (a) (b) N and (c) (d) B doped at position  $n = -4$ . (a) (c) Electronic energy bands for strain-free NW and bending angles with  $\Omega = 0.3^\circ$  and  $\Omega = 0.6^\circ$ . Electronic density distribution (pink spheres) for the (b) CBM state and (d) the VBM state. The isosurface level is  $1.72 \times 10^{-6} e \text{ \AA}^{-3}$ .

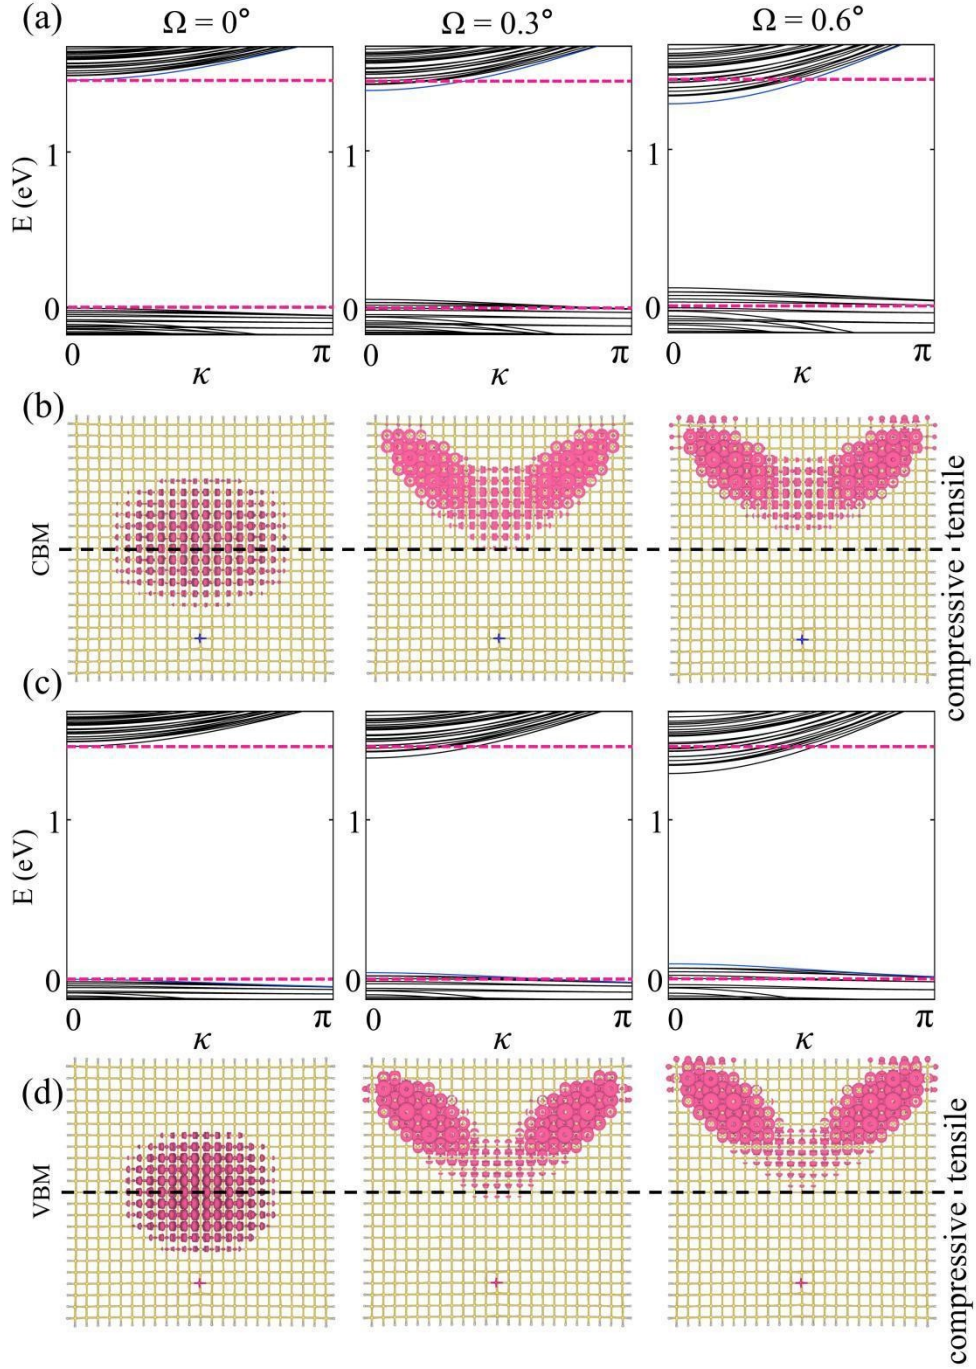

**FIG. S11** [001]-oriented SiNW with a  $3\times$  expanded supercell and a diameter of  $D = 4.22$  nm after (a) (b) N and (c) (d) B doped at position  $n = -4$ . (a) (c) Electronic energy bands for strain-free NW and bending angles with  $\Omega = 0.3^\circ$  and  $\Omega = 0.6^\circ$ . Electronic density distribution (pink spheres) for the (b) CBM state and (d) the VBM state. The isosurface level is  $1.72 \times 10^{-6} e \text{ \AA}^{-3}$ .

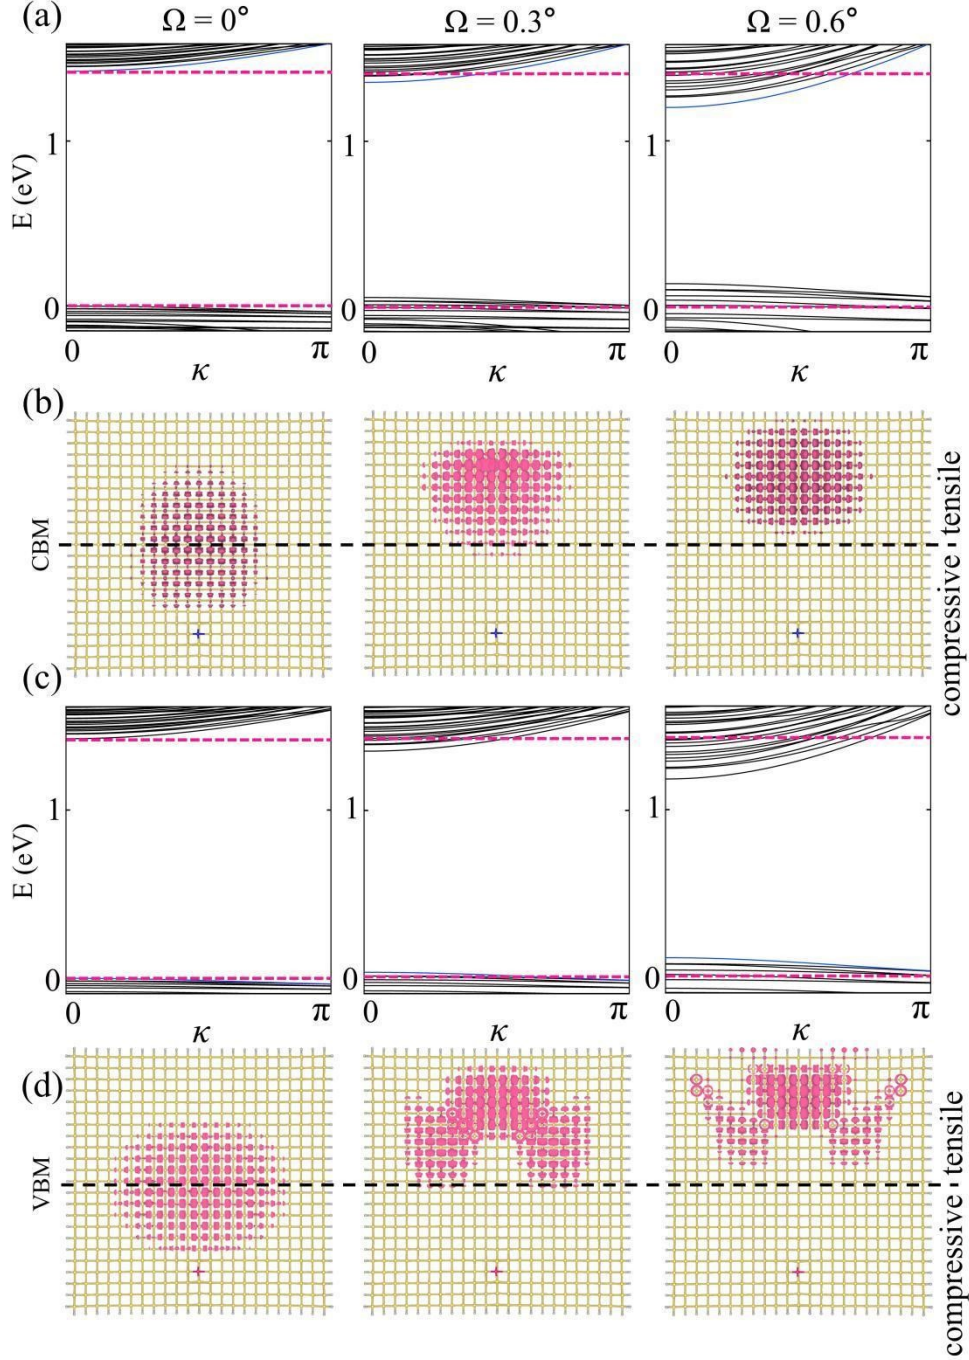

**FIG. S12** [001]-oriented SiNW with a  $4\times$  expanded supercell and a diameter of  $D = 4.22$  nm after (a) (b) N and (c) (d) B doped at position  $n = -4$ . (a) (c) Electronic energy bands for strain-free NW and bending angles with  $\Omega = 0.3^\circ$  and  $\Omega = 0.6^\circ$ . Electronic density distribution (pink spheres) for the (b) CBM state and (d) the VBM state. The isosurface level is  $1.72 \times 10^{-6} e \text{ \AA}^{-3}$ .

S5. Calculations with different diameters.

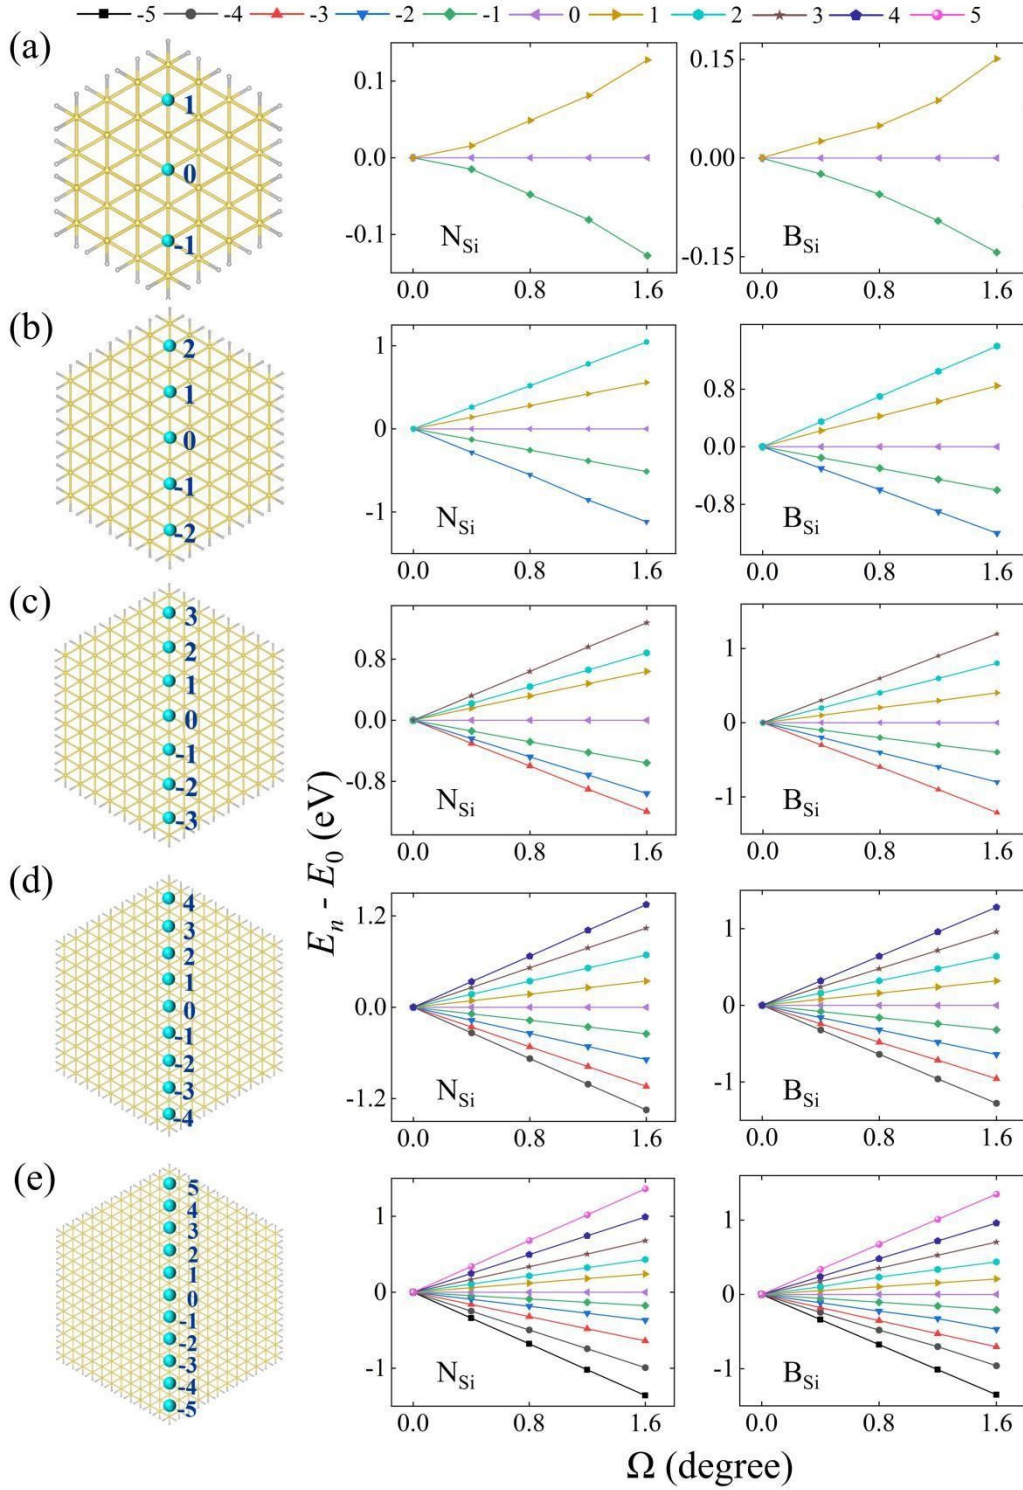

**FIG. S13** [111]-oriented SiNW with a diameter of  $D =$  (a) 1.32 nm, (b) 2.24 nm, (c) 3.1 nm, (d) 3.99 nm, (e) 4.89 nm, with 11 doping sites (blue balls): sites  $n = 1, 2, 3, 4, 5$  are on the tensile side, sites  $n = -1, -2, -3, -4, -5$  are on the compressive side, and site  $n = 0$  is on the neutral

surface. The last two columns are The relative formation energy  $E_n - E_0$  at site  $n$  versus bending angle  $\Omega$  for various doping cases, denoted as  $X_{\text{Si}}$  ( $X = \text{B}, \text{N}$ ), where the host Si atom is substituted with the dopant X atom.

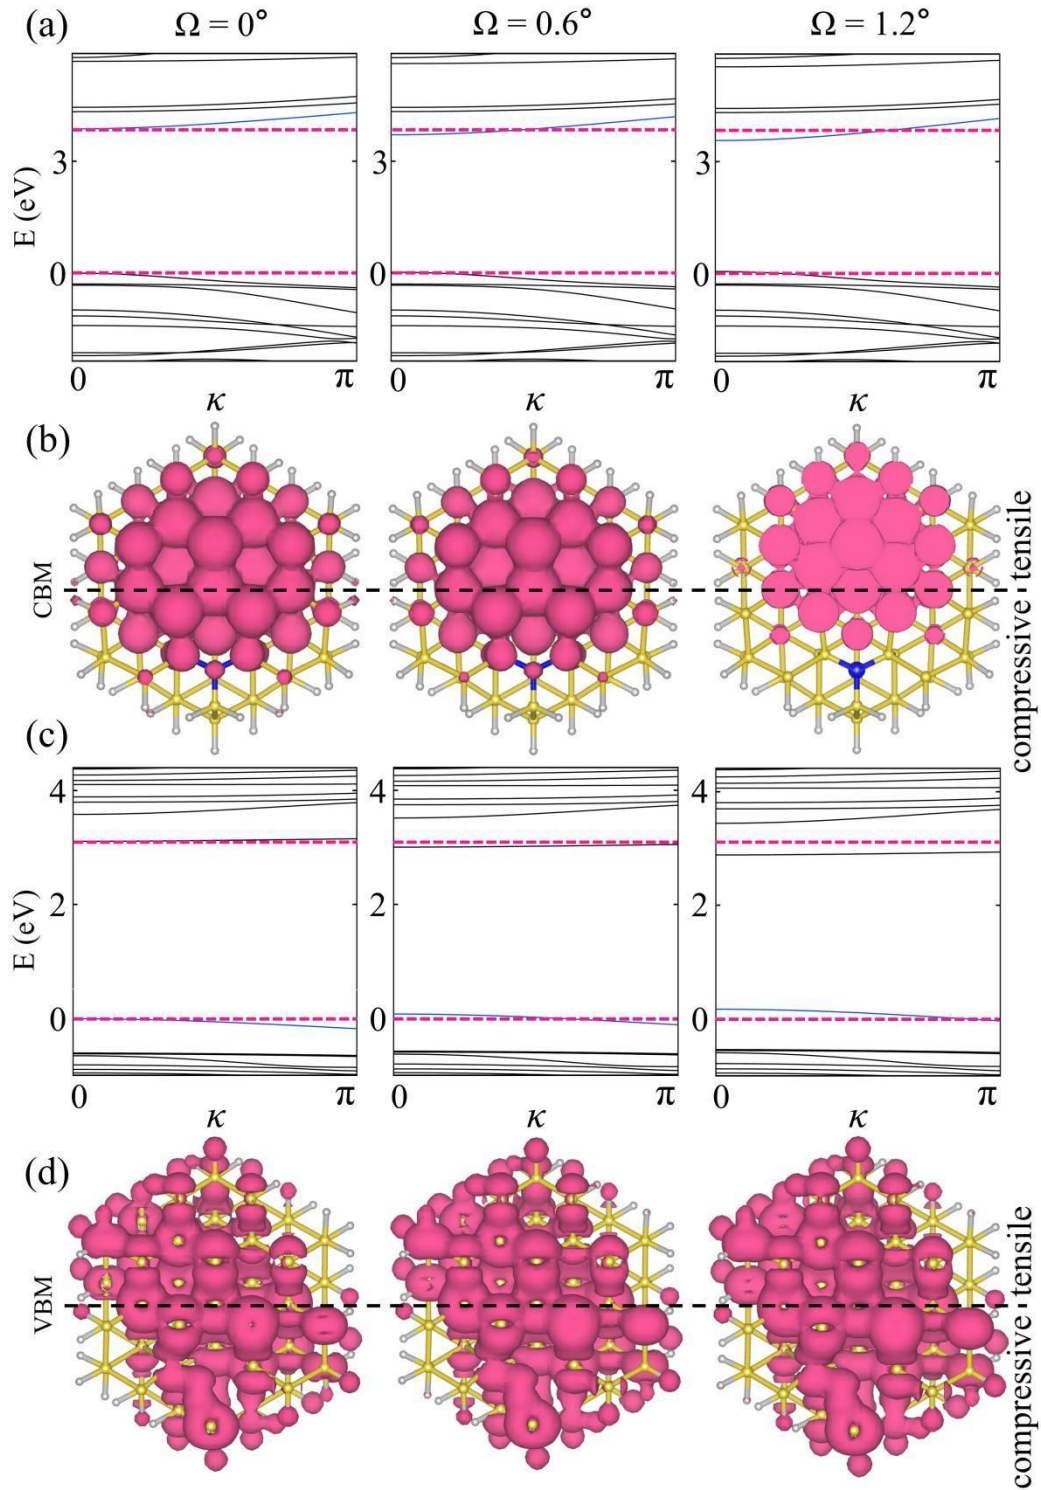

**FIG. S14** [111]-oriented SiNW with a diameter of  $D = 1.32$  nm after (a) (b) N and (c) (d) B doped at position  $n = -4$ . (a) (c) Electronic energy bands for strain-free NW and bending angles with  $\Omega = 0.6^\circ$  and  $\Omega = 1.2^\circ$ . Electronic density distribution (pink spheres) for the (b) CBM state and (d) the VBM state. The isosurface level is  $1.72 \times 10^{-6} e \text{ \AA}^{-3}$ .

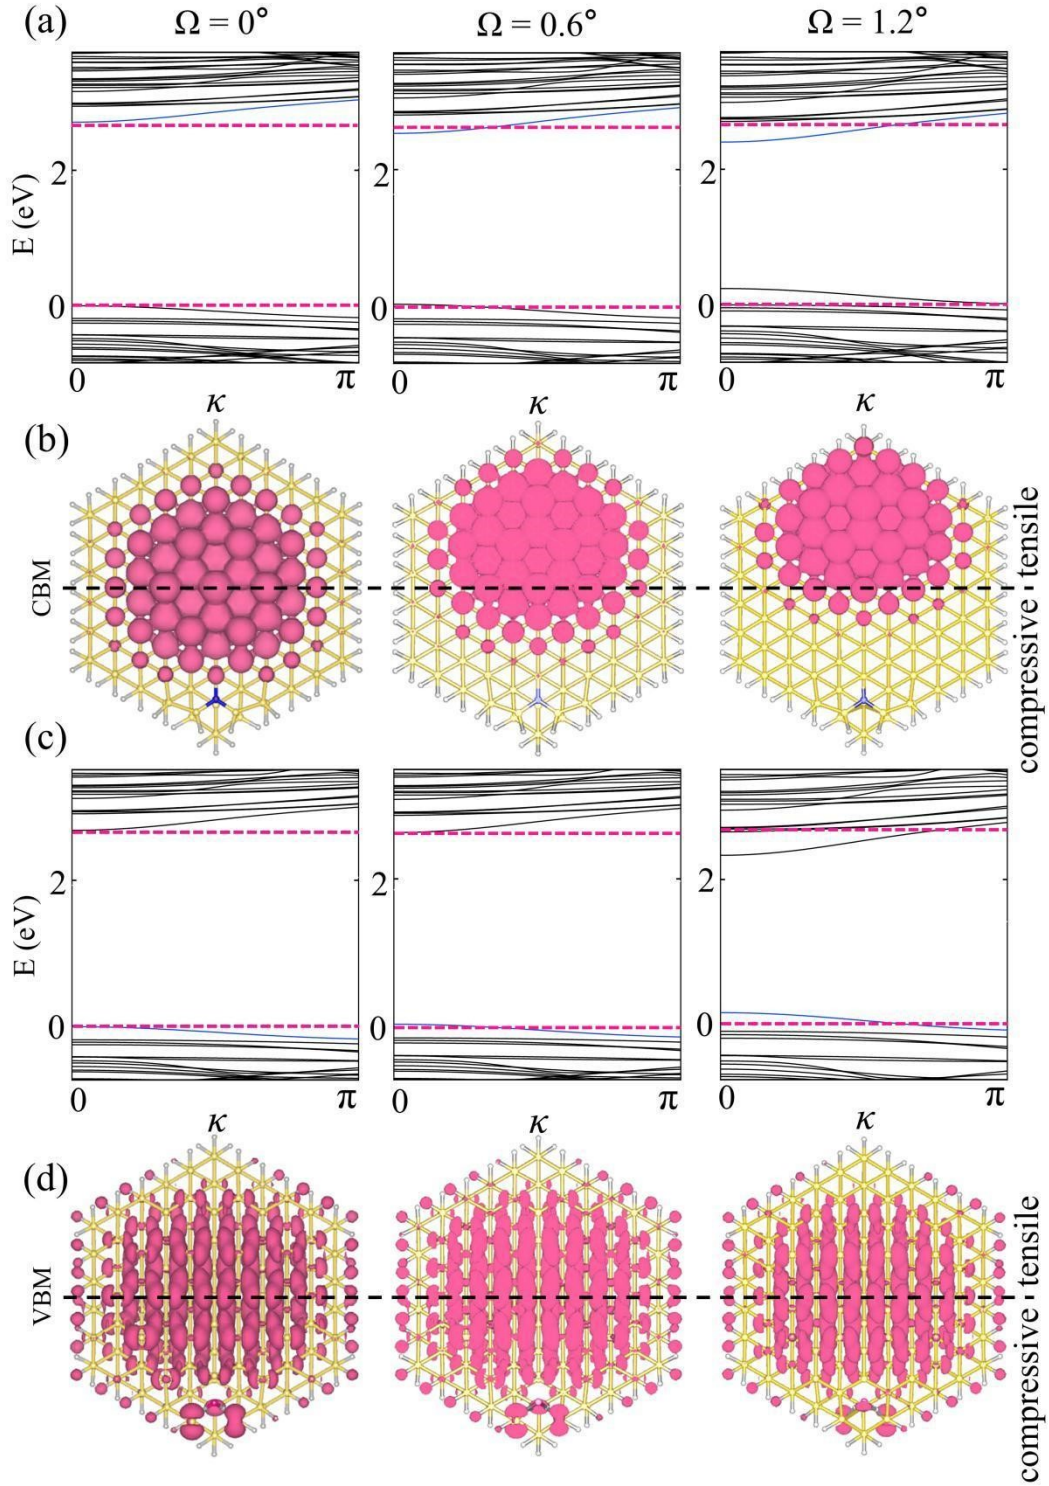

**FIG. S15** [111]-oriented SiNW with a diameter of  $D = 2.24$  nm after (a) (b) N and (c) (d) B doped at position  $n = -4$ . (a) (c) Electronic energy bands for strain-free NW and bending angles with  $\Omega = 0.6^\circ$  and  $\Omega = 1.2^\circ$ . Electronic density distribution (pink spheres) for the (b) CBM state and (d) the VBM state. The isosurface level is  $1.72 \times 10^{-6} e \text{ \AA}^{-3}$ .

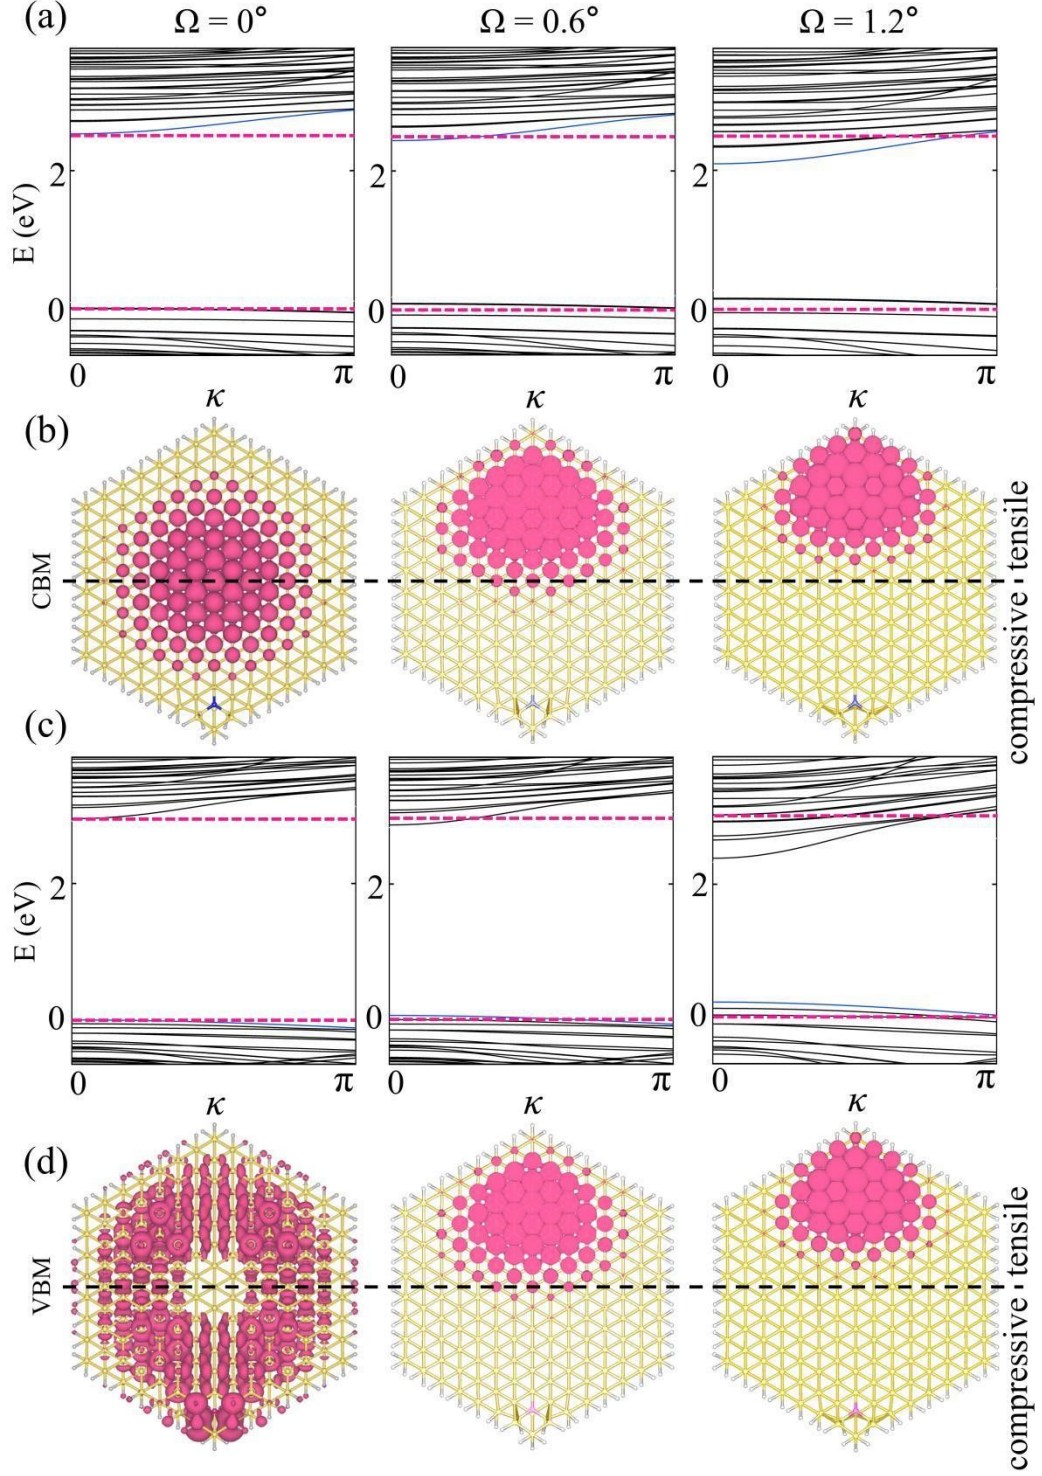

**FIG. S16** [111]-oriented SiNW with a diameter of  $D = 3.1$  nm after (a) (b) N and (c) (d) B doped at position  $n = -4$ . (a) (c) Electronic energy bands for strain-free NW and bending angles with  $\Omega = 0.6^\circ$  and  $\Omega = 1.2^\circ$ . Electronic density distribution (pink spheres) for the (b) CBM state and (d) the VBM state. The isosurface level is  $1.72 \times 10^{-6} e \text{ \AA}^{-3}$ .

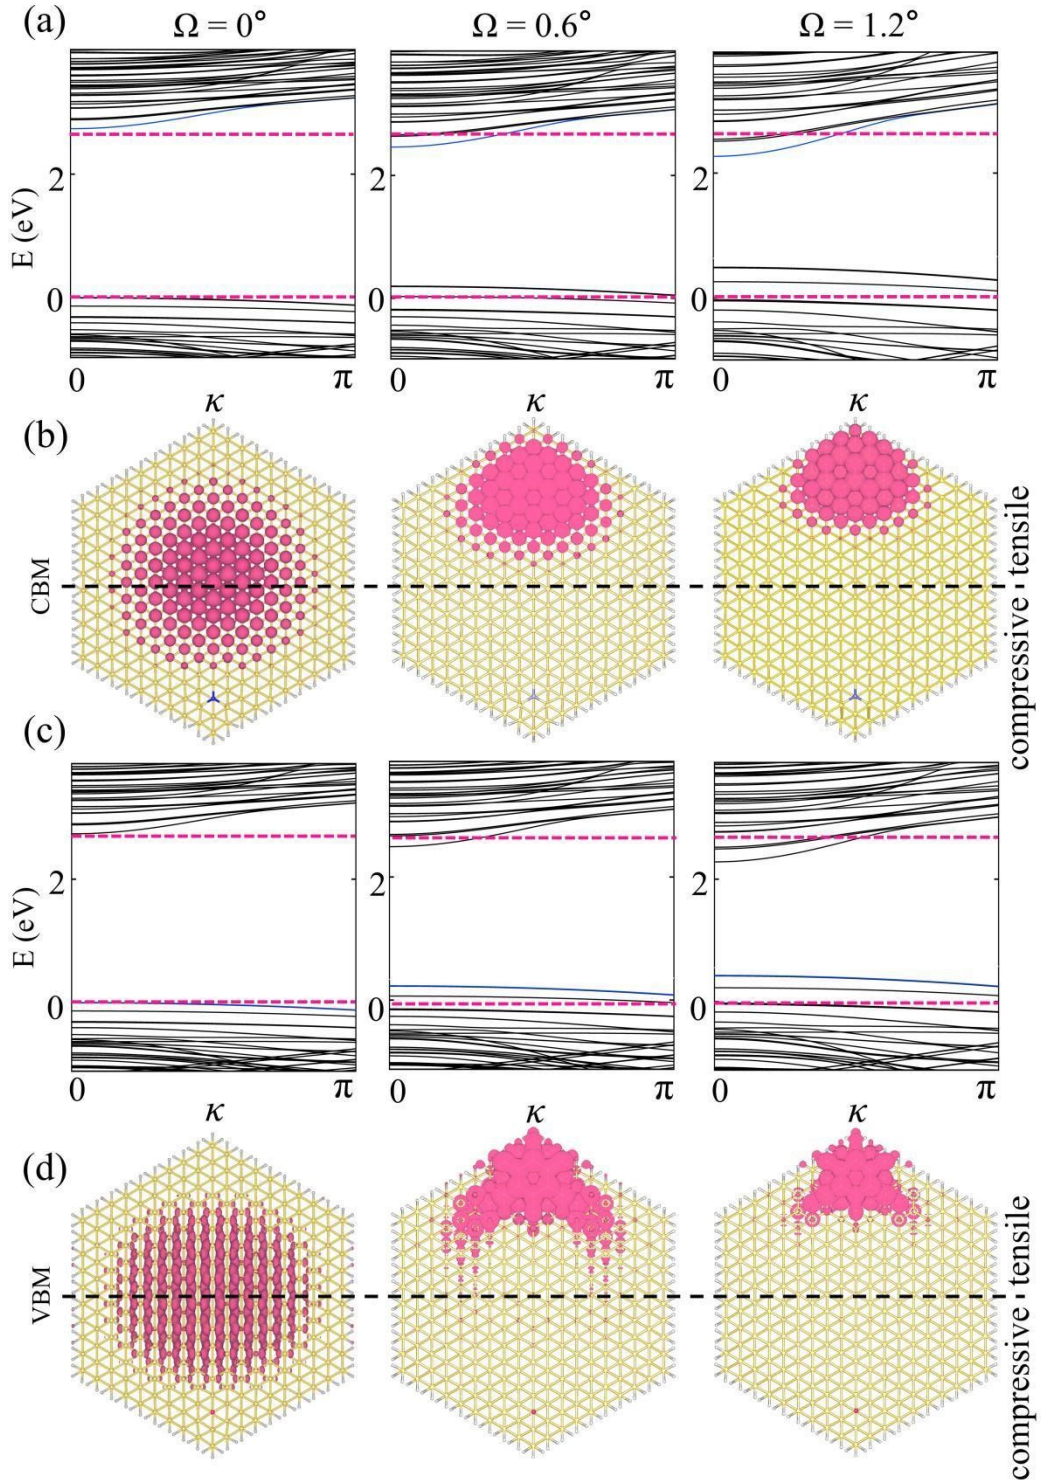

**FIG. S17** [111]-oriented SiNW with a diameter of  $D = 3.99$  nm after (a) (b) N and (c) (d) B doped at position  $n = -4$ . (a) (c) Electronic energy bands for strain-free NW and bending angles

with  $\Omega = 0.6^\circ$  and  $\Omega = 1.2^\circ$ . Electronic density distribution (pink spheres) for the (b) CBM state and (d) the VBM state. The isosurface level is  $1.72 \times 10^{-6} \text{ e \AA}^{-3}$ .

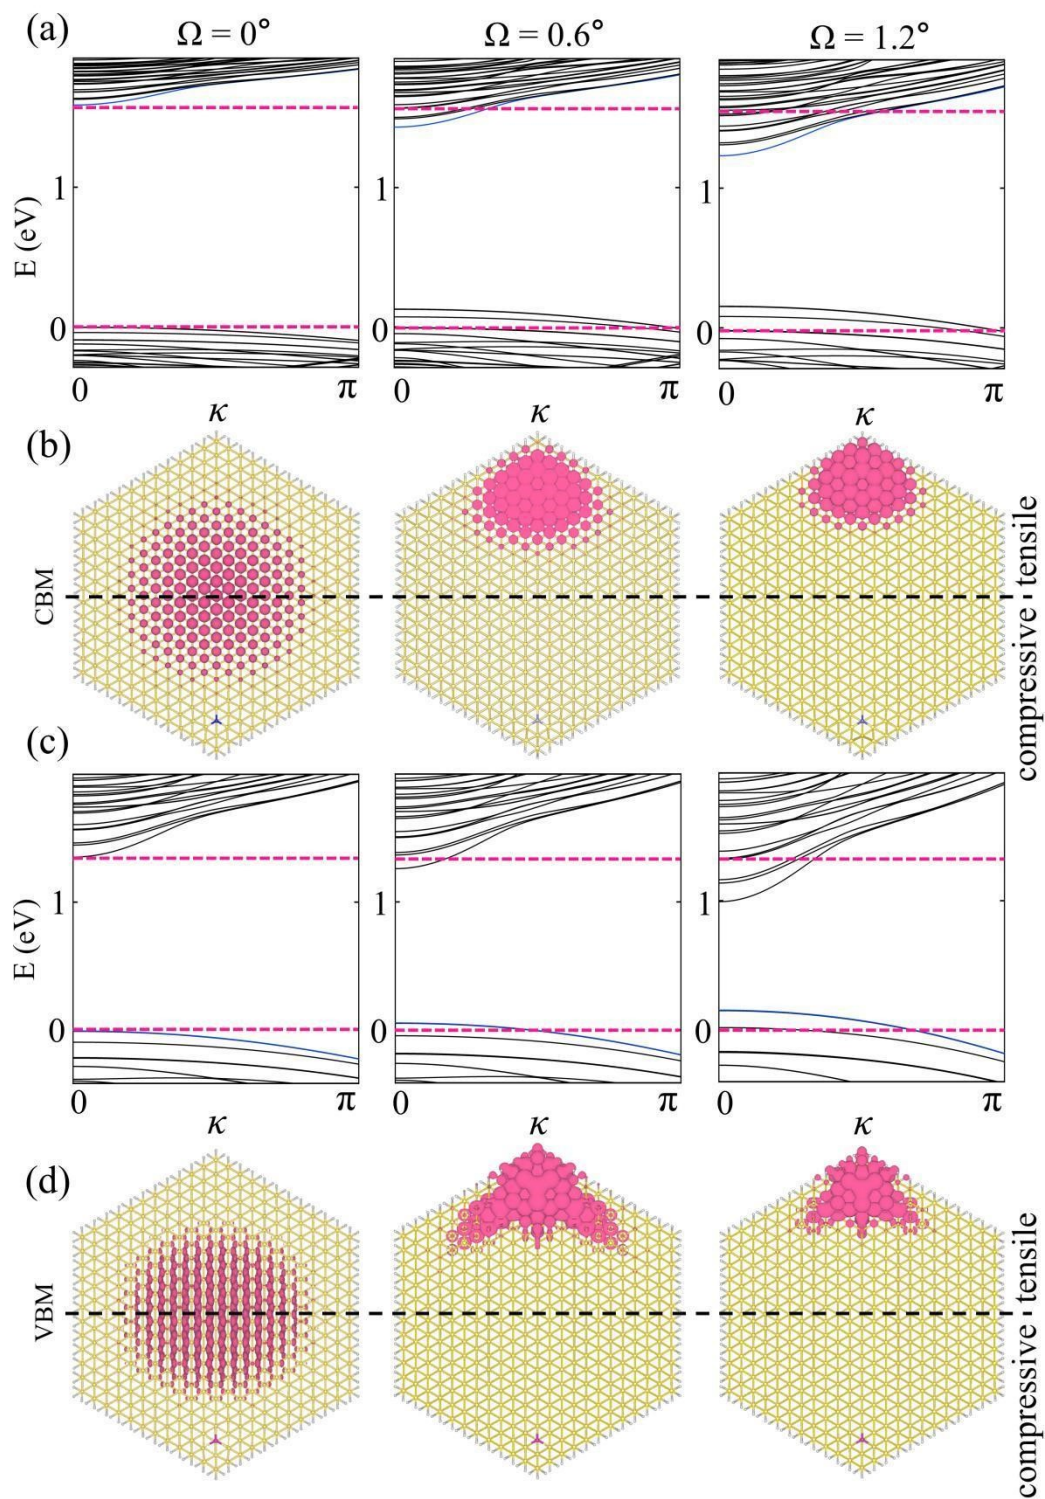

**FIG. S18** [111]-oriented SiNW with a diameter of  $D = 4.89 \text{ nm}$  after (a) (b) N and (c) (d) B doped at position  $n = -4$ . (a) (c) Electronic energy bands for strain-free NW and bending angles

with  $\Omega = 0.6^\circ$  and  $\Omega = 1.2^\circ$ . Electronic density distribution (pink spheres) for the (b) CBM state and (d) the VBM state. The isosurface level is  $1.72 \times 10^{-6} e \text{ \AA}^{-3}$ .

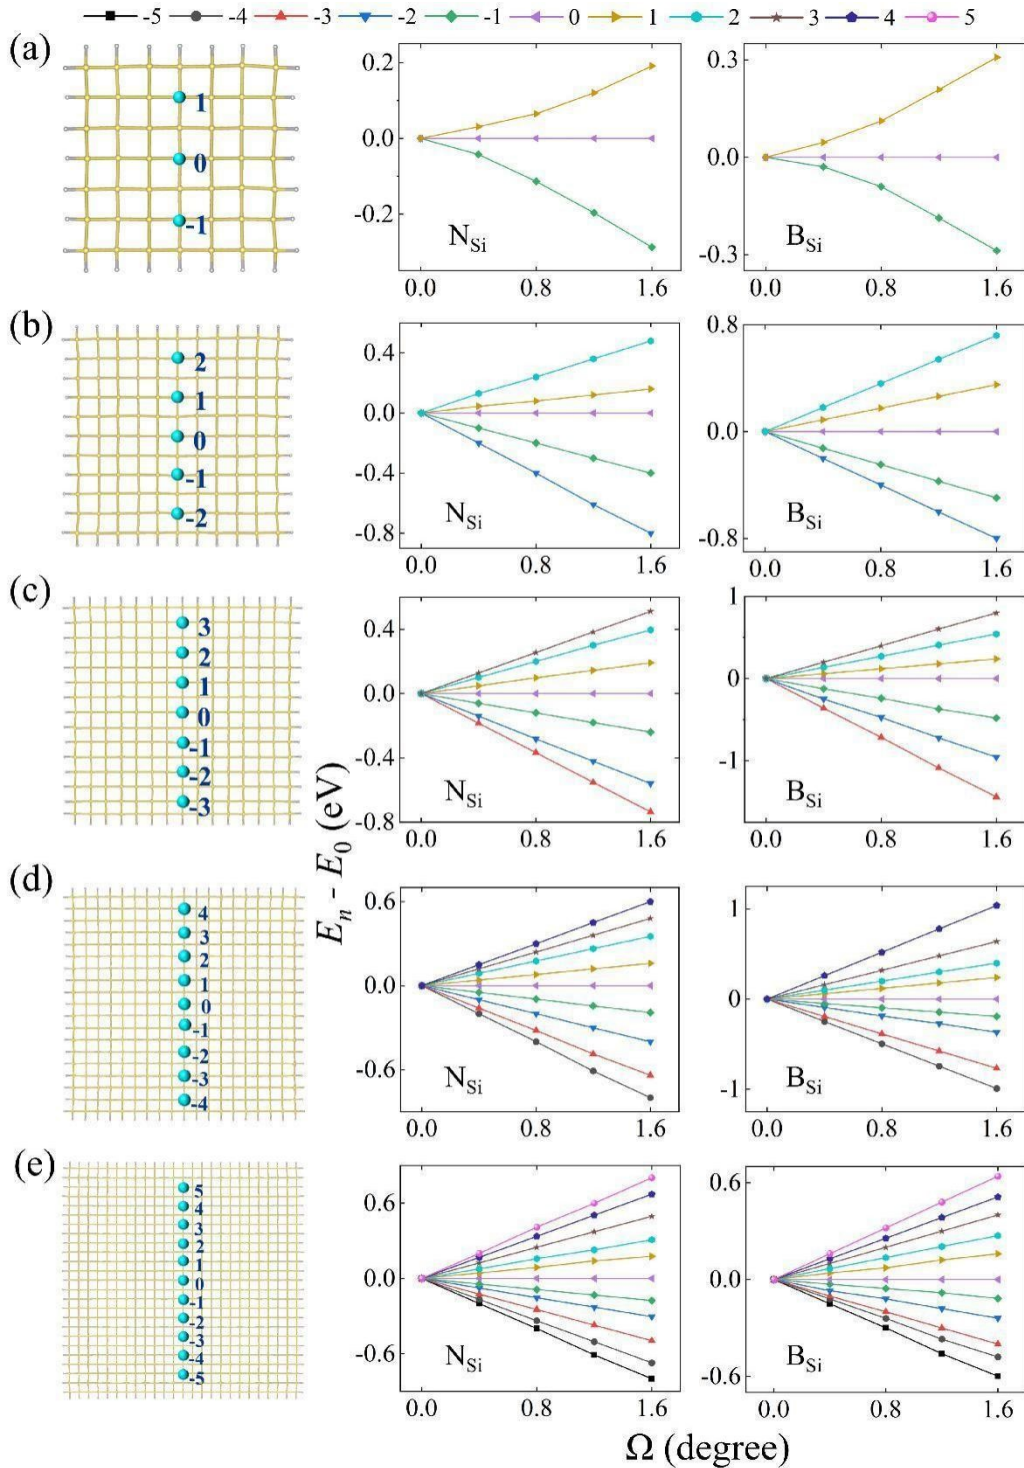

**FIG. S19** [001]-oriented SiNW with a diameter of  $D =$  (a) 1.15 nm, (b) 1.92 nm, (c) 2.68 nm, (d) 3.45 nm, (e) 4.61 nm, with 11 doping sites (blue balls): sites  $n = 1, 2, 3, 4, 5$  are on the

tensile side, sites  $n = -1, -2, -3, -4, -5$  are on the compressive side, and site  $n = 0$  is on the neutral surface. The last two columns are The relative formation energy  $E_n - E_0$  at site  $n$  versus bending angle  $\Omega$  for various doping cases, denoted as  $X_{\text{Si}}$  ( $X = \text{B}, \text{N}$ ), where the host Si atom is substituted with the dopant X atom.

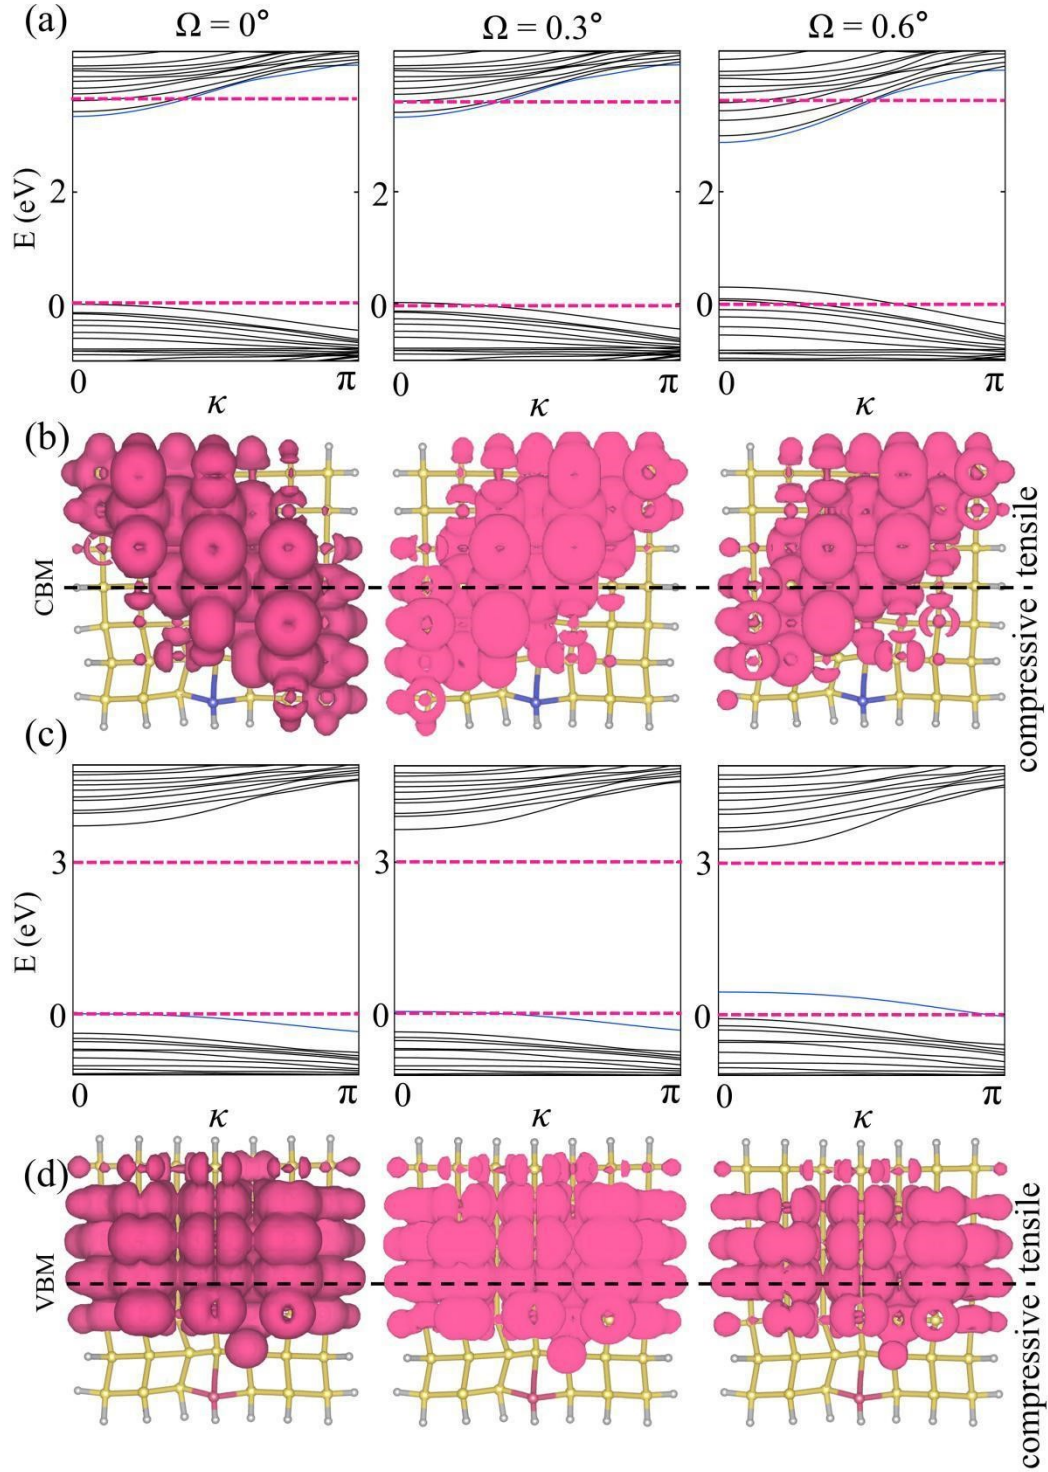

**FIG. S20** [001]-oriented SiNW with a diameter of  $D = 1.15$  nm after (a) (b) N and (c) (d) B doped at position  $n = -4$ . (a) (c) Electronic energy bands for strain-free NW and bending angles with  $\Omega = 0.3^\circ$  and  $\Omega = 0.6^\circ$ . Electronic density distribution (pink spheres) for the (b) CBM state and (d) the VBM state. The isosurface level is  $1.72 \times 10^{-6} e \text{ \AA}^{-3}$ .

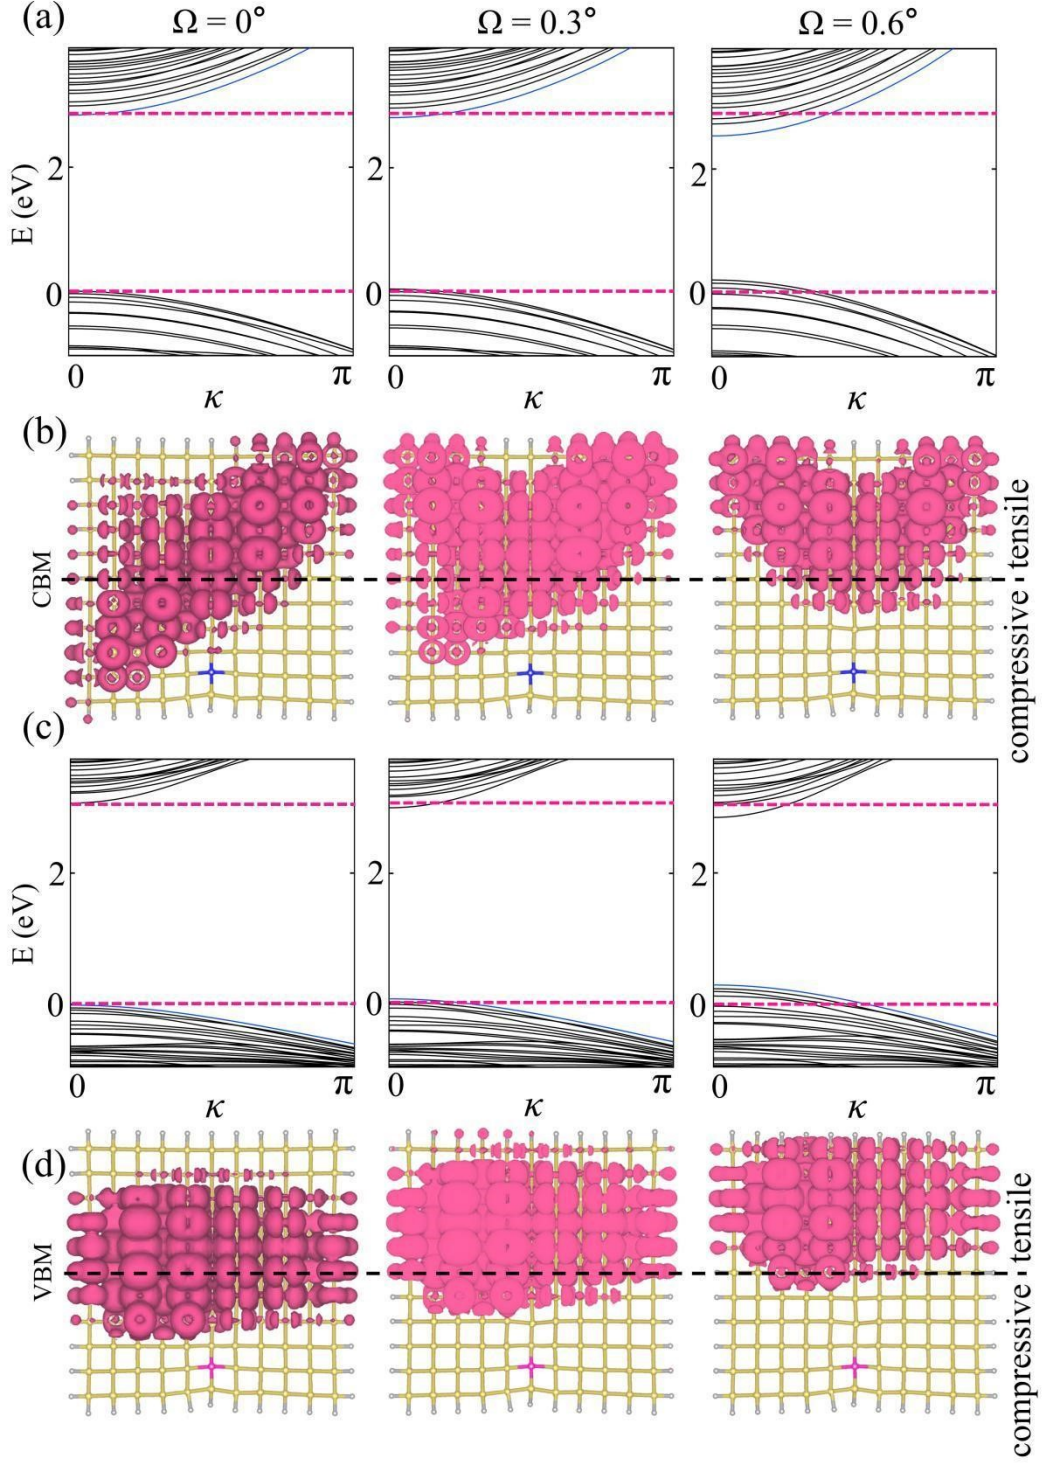

**FIG. S21** [001]-oriented SiNW with a diameter of  $D = 1.92$  nm after (a) (b) N and (c) (d) B doped at position  $n = -4$ . (a) (c) Electronic energy bands for strain-free NW and bending angles with  $\Omega = 0.3^\circ$  and  $\Omega = 0.6^\circ$ . Electronic density distribution (pink spheres) for the (b) CBM state and (d) the VBM state. The isosurface level is  $1.72 \times 10^{-6} e \text{ \AA}^{-3}$ .

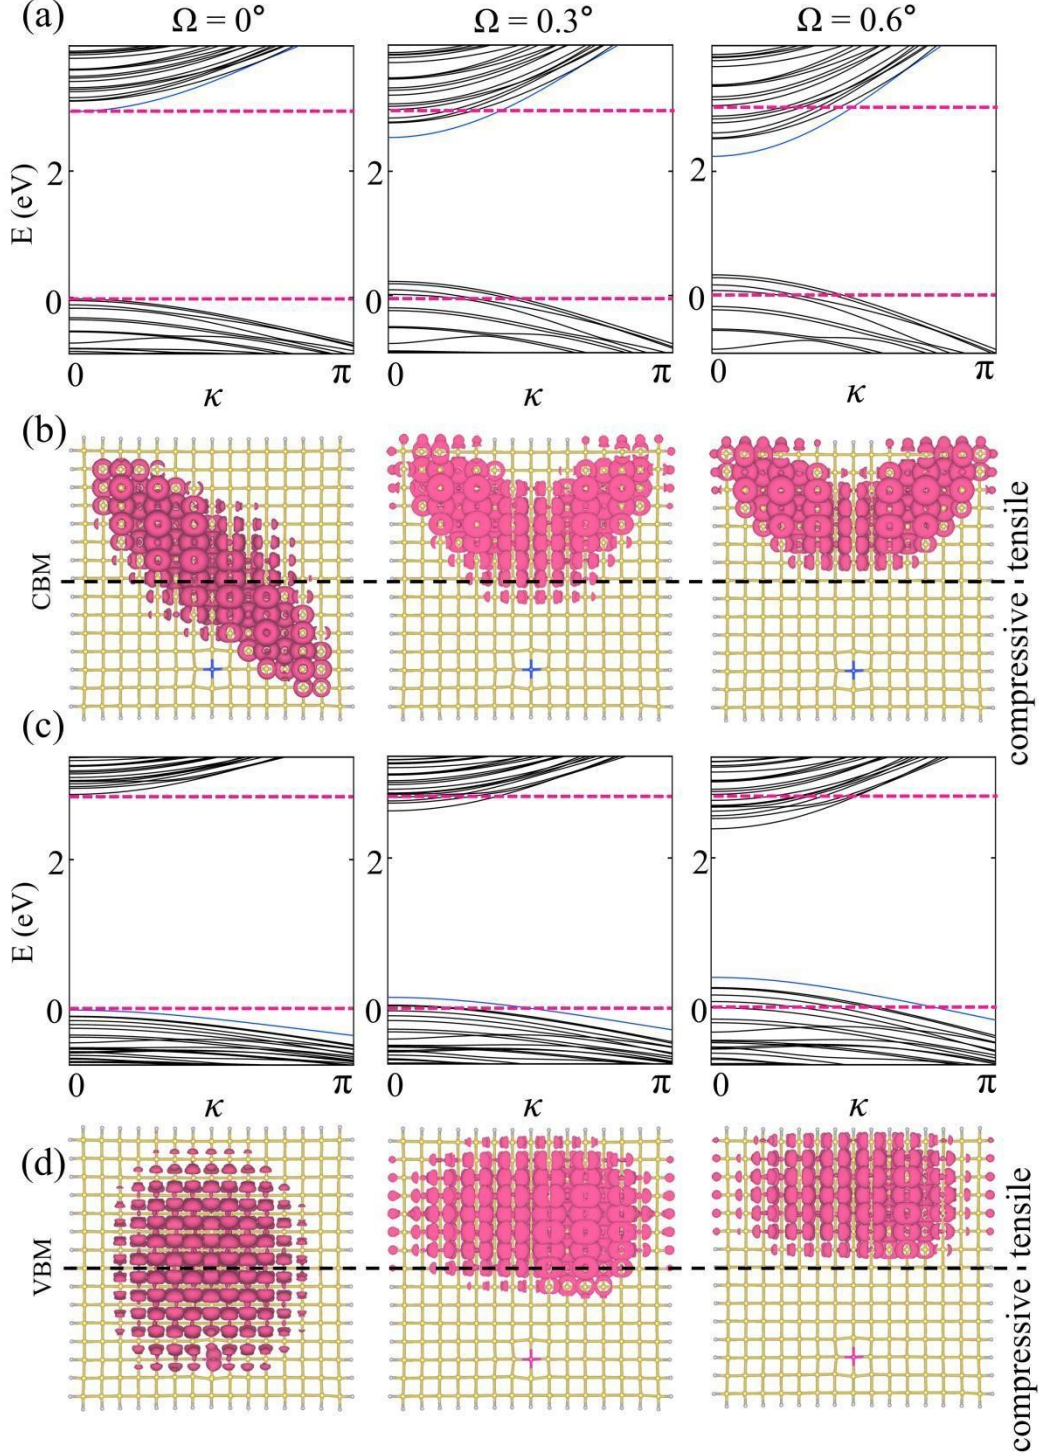

**FIG. S22** [001]-oriented SiNW with a diameter of  $D = 2.68$  nm after (a) (b) N and (c) (d) B doped at position  $n = -4$ . (a) (c) Electronic energy bands for strain-free NW and bending angles with  $\Omega = 0.3^\circ$  and  $\Omega = 0.6^\circ$ . Electronic density distribution (pink spheres) for the (b) CBM state and (d) the VBM state. The isosurface level is  $1.72 \times 10^{-6} e \text{ \AA}^{-3}$ .

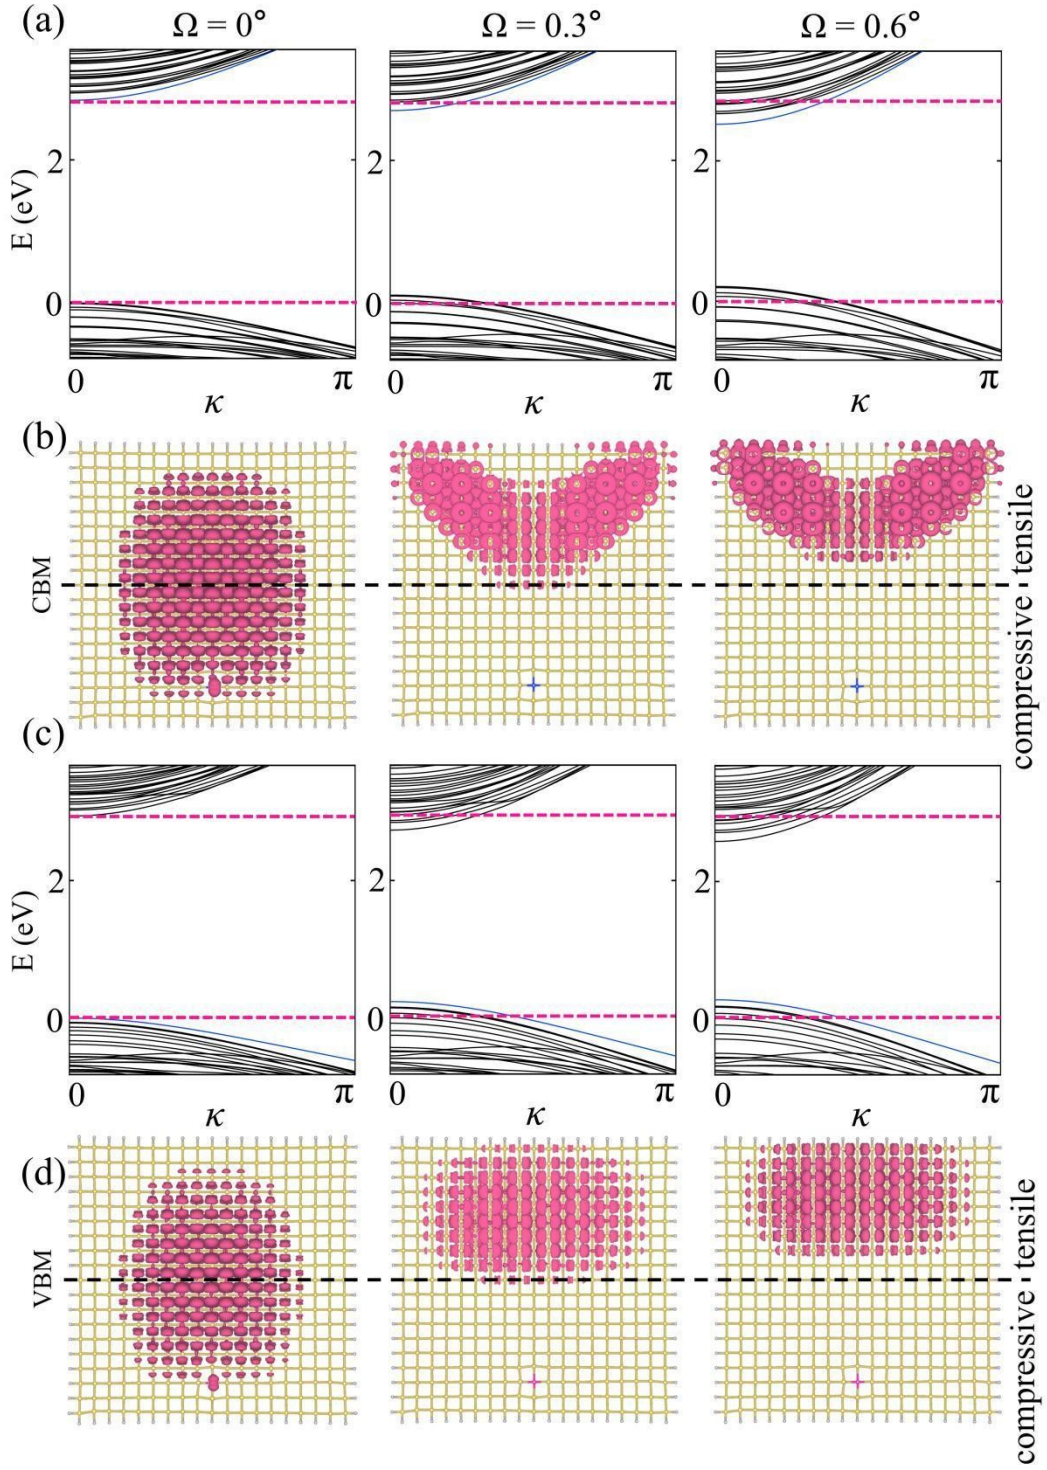

**FIG. S23** [001]-oriented SiNW with a diameter of  $D = 3.45$  nm after (a) (b) N and (c) (d) B doped at position  $n = -4$ . (a) (c) Electronic energy bands for strain-free NW and bending angles with  $\Omega = 0.3^\circ$  and  $\Omega = 0.6^\circ$ . Electronic density distribution (pink spheres) for the (b) CBM state and (d) the VBM state. The isosurface level is  $1.72 \times 10^{-6} e \text{ \AA}^{-3}$ .

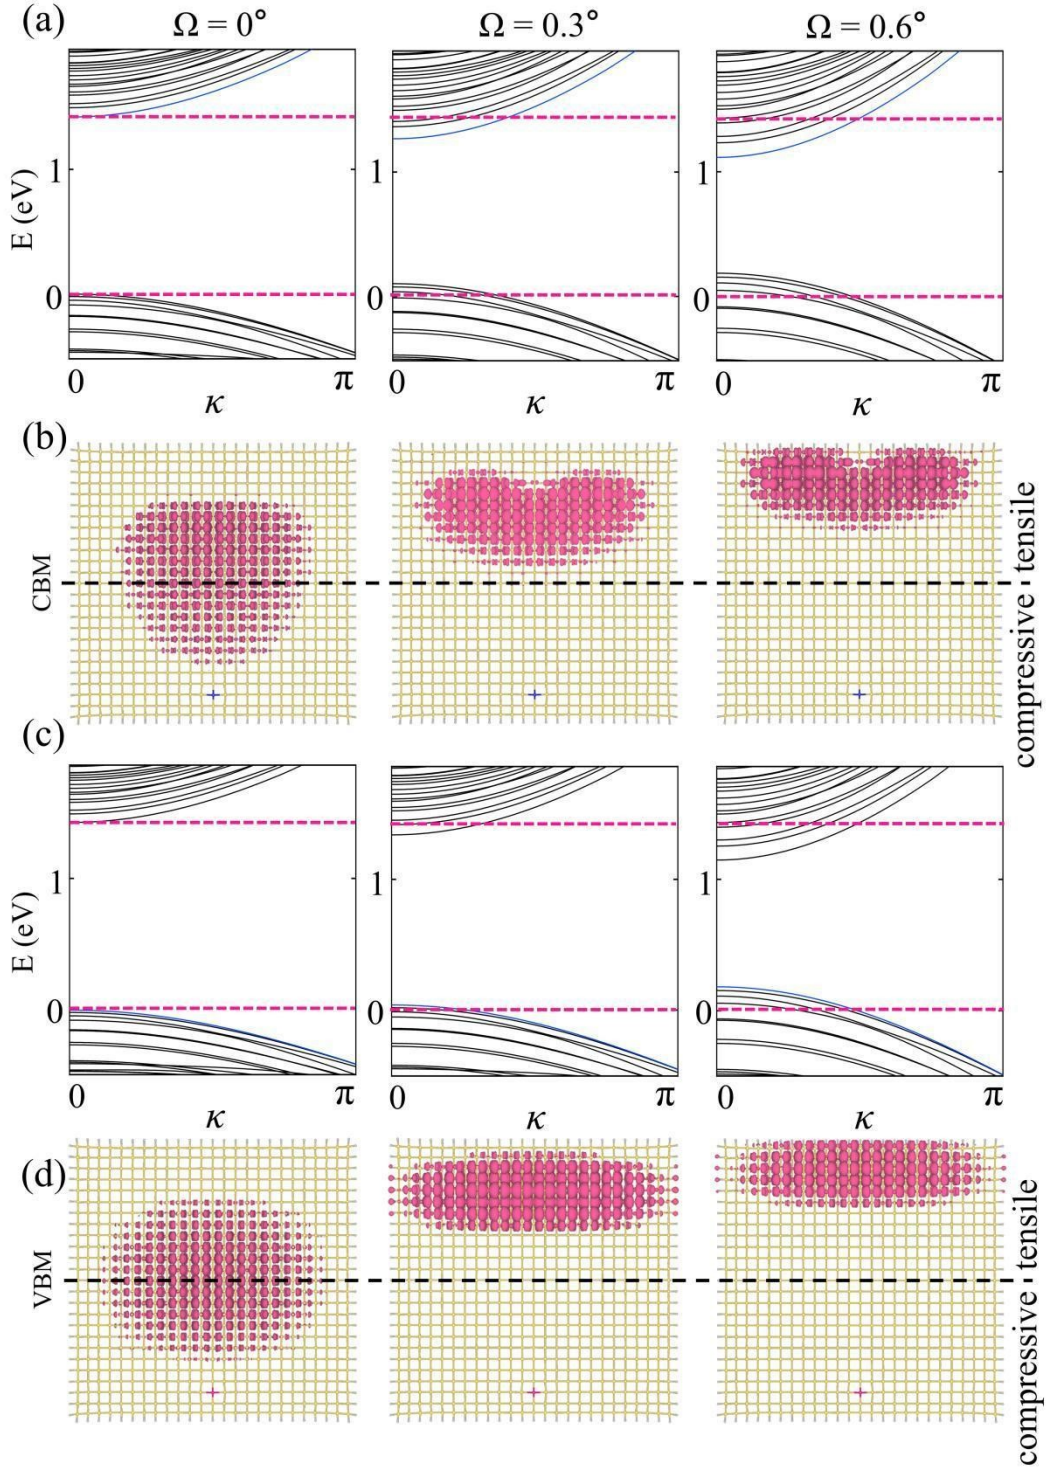

**FIG. S24** [001]-oriented SiNW with a diameter of  $D = 4.61$  nm after (a) (b) N and (c) (d) B doped at position  $n = -4$ . (a) (c) Electronic energy bands for strain-free NW and bending angles with  $\Omega = 0.3^\circ$  and  $\Omega = 0.6^\circ$ . Electronic density distribution (pink spheres) for the (b) CBM state and (d) the VBM state. The isosurface level is  $1.72 \times 10^{-6} \text{ e \AA}^{-3}$ .
